# Supplementary material for: Construction of a chiral zinc–camphorate framework for enantioselective separation
Source: Royal Society of Chemistry journal article supplement (doi:10.1039/d2dt01221a), 2022-01-01

# Construction of A Chiral Zinc-Camphorate Framework for Enantioselective Separation

## Table of Content

1. Materials and general procedures.
2. Synthesis of chiral MOF *D-1*.
3. Table S1. Crystal data and structure refinement for *D-1*.
4. Table S2. Selected Bond lengths [Å] and angles [°] for *D-1*.
5. Experimental procedure for enantioselective adsorption and separation.
6. Figure S1. PXRD patterns of *D-1*.
7. Figure S2. TGA curves of *D-1*.
8. Figure S3. IR spectra of *D*-camH<sub>2</sub>, DPTPA and *D-1*.
9. Figure S4. View the FL spectra of *D*-camH<sub>2</sub>, DPTPA and *D-1*, and their optical photos of under sunlight and UV light, respectively.
10. Figure S5. UV-vis spectra of *D*-camH<sub>2</sub>, DPTPA and *D-1*
11. Figure S6. The adsorption of *D-1* to dye molecules.
12. Figure S7. HPLC results of 1-phenylethanol resolved by *D-1* at different conditions (in Table S3).
13. Figure S8. HPLC results of chiral molecules resolved by *D-1* (in Figure 2 and 3).
14. Figure S9. Structural drawing of asymmetric unit of *D-1*.

## 1. Materials and general procedures.

All of the chemicals are commercially available and used without any further purification. Single-crystal XRD data for *D-1* were collected several times at 100 K at NFPS (Shanghai) synchrotron radiation on BL17B beamline using  $\lambda = 0.67042 \text{ \AA}$ , and the obtained dataset was indexed, integrated and scaled using the APEX4 program. The structure of *D-1* was solved by the direct methods with SHELXS-2018 and refined with SHELXL-2018 using *OLEX 2-1.2*. All the hydrogen atoms attached to the ligand were placed in calculated positions and refined using a riding model. Contributions to scattering due to these highly disordered guest molecules in *D-1* were removed using the SQUEEZE subroutine of the PLATON software package. The structure was then refined again using the resulting new HKL file. *D-1* can be best formulated as  $[\text{Zn}_2(\text{D-Cam})_2(\text{DPTPA}) \cdot 2\text{H}_2\text{O}] \cdot 2\text{DMF} \cdot 2\text{MeOH}$ , on the basis of single-crystal diffraction, IR spectra, UV-vis spectra, FL spectra and thermogravimetric analyses (TGA). Crystal data and details of the data collection are given in Table S1, while the selected bond distances and angles are presented in Tables S2. CCDC number of *D-1* is 2167425, which contain the supplementary crystallographic data for this paper. These data can be obtained free of charge via [www.ccdc.cam.ac.uk/data\\_request/cif](http://www.ccdc.cam.ac.uk/data_request/cif). Thermogravimetric analysis of *D-1* was carried out in a nitrogen atmosphere with a heating rate of  $10 \text{ }^\circ\text{C}/\text{min}$  on a TGA-50 thermogravimetric analyzer. Powder X-ray diffraction (PXRD) data were collected on a DMAX2500 diffractometer using Cu  $K\alpha$  radiation. The simulated powder pattern was calculated using Mercury based on single crystal diffraction data of *D-1*. The date of dye absorption experiment was recorded on an Agilent Technologies carry UV/Vis Spectrometer. The IR (KBr pellet) spectrum was recorded ( $400\text{-}4000 \text{ cm}^{-1}$  region) on a Nicolet Magna 750 FTIR spectrometer. Fluorescence spectra were recorded on a PerkinElmer FL 8500 spectrometer. Analytical high-performance liquid chromatography (HPLC) was performed on an Agilent Technologies 1260 Infinity II with UV detection. Analytical ChiralCel OD-H/OJ-H/AS-H/IC-H/AD-H/IA-H column ( $4.6 \text{ mm} \times 25 \text{ cm}$ ) from Daicel were used.

## 2. Synthesis of *D-1* and *L-1*.

A mixture of ZnCl<sub>2</sub> (2.7 mg, 0.02 mmol), *D*-camphoric acid (*D*-CamH<sub>2</sub>) (4 mg, 0.02 mmol) and DPTPA co-ligand (6.4 mg, 0.02 mmol) was placed in a glass vial containing DMF (2 mL), MeOH (2 mL), H<sub>2</sub>O (1 mL). The vial was sealed tightly and heated at 60°C for two days, colorless block crystals of [Zn<sub>2</sub>(*D*-Cam)<sub>2</sub>(DPTPA)·2H<sub>2</sub>O]·2DMF·2MeOH (*D-1*) were generated. The crystals of *L-1* can be obtained under the same synthetic condition as that of *D-1* except the *D*-camH<sub>2</sub> was instead by *L*-CamH<sub>2</sub>.

## 3. Table S1. Crystal data and structure refinement for *D-1*

|                                               |                                                                                                                     |
|-----------------------------------------------|---------------------------------------------------------------------------------------------------------------------|
| Identification code                           | <i>D-1</i>                                                                                                          |
| Empirical formula                             | C <sub>46</sub> H <sub>67</sub> N <sub>6</sub> O <sub>16</sub> Zn <sub>2</sub>                                      |
| Formula weight                                | 1090.79                                                                                                             |
| Temperature (K)                               | 100                                                                                                                 |
| Wavelength (Å)                                | 0.67042                                                                                                             |
| Crystal system, space group                   | Monoclinic, <i>P2</i> <sub>1</sub>                                                                                  |
| Unit cell dimensions                          | a = 8.189(1) Å    alpha = 90 deg.<br>b = 20.317(3) Å    beta = 98.647(5) deg.<br>c = 17.675(3) Å    gamma = 90 deg. |
| Volume                                        | 2907.3(8) Å <sup>3</sup>                                                                                            |
| Z, Calculated density                         | 2, 1.246 mg/m <sup>3</sup>                                                                                          |
| Absorption coefficient                        | 0.763 mm <sup>-1</sup>                                                                                              |
| F(000)                                        | 930                                                                                                                 |
| θ range for data collection (°)               | 1.099 to 23.927                                                                                                     |
| Limiting indices                              | -9 ≤ h ≤ 9, -24 ≤ k ≤ 24, -21 ≤ l ≤ 21                                                                              |
| Reflections collected independent reflections | 30140 / 10347 [R(int) = 0.0981]                                                                                     |
| Completeness to theta Refinement method       | 98.4 %                                                                                                              |
| Refinement method                             | Full-matrix least-squares on <i>F</i> <sup>2</sup>                                                                  |
| Data / restraints / parameters                | 10347 / 63 / 494                                                                                                    |
| Goodness-of-fit on <i>F</i> <sup>2</sup>      | 1.066                                                                                                               |
| Final R indices [ <i>I</i> > 2σ( <i>I</i> )]  | R1 = 0.0879, wR2 = 0.2480                                                                                           |
| R indices (all data)                          | R1 = 0.1134, wR2 = 0.2705                                                                                           |

**4. Table S2. Selected Bond lengths [ $\text{\AA}$ ] and angles [ $^\circ$ ] for *D*-1.**

---

|                     |           |
|---------------------|-----------|
| O4-Zn(2)            | 2.413(7)  |
| O(3)-Zn(2)          | 2.042(6)  |
| N(4)-Zn(1)          | 2.088(4)  |
| O(8)-Zn(1)#1        | 2.028(11) |
| N(1)-Zn(2)          | 1.992(4)  |
| O(1)-Zn(1)#2        | 1.979(10) |
| O(6)-Zn(2)          | 2.159(10) |
| O(11)-Zn(2)         | 2.138(12) |
| O(12)-Zn(1)         | 2.201(13) |
| O(5)-Zn(2)          | 2.115(10) |
| O2-Zn(1) #2         | 2.429(10) |
|                     |           |
| N(4)-Zn(1)-O(12)    | 99.2(4)   |
| N(4)-Zn(1)-O(2)#4   | 155.9(4)  |
| O(8)#3-Zn(1)-N(4)   | 104.1(3)  |
| O(8)#3-Zn(1)-O(12)  | 99.0(5)   |
| O(8)#3-Zn(1)-O(2)#4 | 99.1(4)   |
| O(1)#4-Zn(1)-N(4)   | 101.1(4)  |
| O(1)#4-Zn(1)-O(8)#3 | 141.4(5)  |
| O(1)#4-Zn(1)-O(12)  | 105.3(5)  |
| O(1)#4-Zn(1)-O(2)#4 | 55.4(5)   |
| O(12)-Zn(1)-O(2)#4  | 83.5(4)   |
| O(3)-Zn(2)-O(4)     | 56.1(3)   |
| O(3)-Zn(2)-O(6)     | 149.5(4)  |
| O(3)-Zn(2)-O(11)    | 97.3(4)   |
| O(3)-Zn(2)-O(5)     | 97.0(3)   |
| N(1)-Zn(2)-O(4)     | 93.8(3)   |
| N(1)-Zn(2)-O(3)     | 99.3(3)   |
| N(1)-Zn(2)-O(6)     | 99.8(4)   |
| N(1)-Zn(2)-O(11)    | 95.0(3)   |
| N(1)-Zn(2)-O(5)     | 163.2(3)  |
| O(6)-Zn(2)-O(4)     | 99.0(3)   |
| O(11)-Zn(2)-O(4)    | 153.1(4)  |
| O(11)-Zn(2)-O(6)    | 104.4(5)  |
| O(5)-Zn(2)-O(4)     | 91.6(3)   |
| O(5)-Zn(2)-O(6)     | 63.5(4)   |
| O(5)-Zn(2)-O(11)    | 87.2(4)   |

---

Symmetry transformations used to generate equivalent atoms:

#1 1-x, -1/2+y, -2-z      #2 2-x, -1/2+y, -1-z  
 #3 1-x, 1/2+y, -2-z      #4 2-x, 1/2+y, -1-z

## 5. Experimental procedure for enantioseparation.

A typical procedure for enantioseparation: The solvent-exchanged crystals of *D-1* (50 mg) with dry acetone were firstly soaked in acetone (2 mL) solution of 1-phenylethanol (1-PE) in different concentrations as the following table for 12 hours (Table S3). After which, the solid crystals were filtered, washed with acetone, and then soaked in fresh acetone to extract the encapsulated chiral 1-PE molecules in *D-1*. The optical purity of encapsulated chiral 1-PE molecules was determined by HPLC equipped with chiral column. Other chiral substrates were separated under the identical optimized conditions as entry 2.

Table S3. Optimization of separation condition of *D-1*

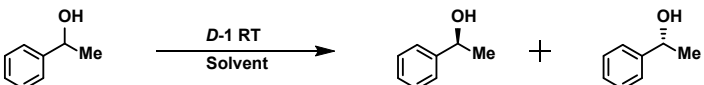

| Entry | Host       | Solvent                         | Substrate concentration (mM) | ee(%)          |
|-------|------------|---------------------------------|------------------------------|----------------|
| 1     | <i>D-1</i> | Acetone                         | 5                            | 99(S)          |
| 2     | <i>D-1</i> | Acetone                         | 10                           | 99(S)          |
| 3     | <i>D-1</i> | Acetone                         | 15                           | 95(S)          |
| 4     | <i>D-1</i> | Acetone                         | 20                           | 90(S)          |
| 5     | <i>D-1</i> | Acetone                         | 30                           | 84(S)          |
| 6     | <i>D-1</i> | Acetone                         | 40                           | 74(S)          |
| 7     | <i>L-1</i> | Acetone                         | 10                           | 99( <i>R</i> ) |
| 8     | <i>D-1</i> | MeOH                            | 10                           | 69(S)          |
| 9     | <i>D-1</i> | EtOH                            | 10                           | 50(S)          |
| 10    | <i>D-1</i> | THF                             | 10                           | 39(S)          |
| 11    | <i>D-1</i> | CHCl <sub>3</sub>               | 10                           | 43(S)          |
| 12    | <i>D-1</i> | CH <sub>2</sub> Cl <sub>2</sub> | 10                           | 58(S)          |
| 13    | <i>D-1</i> | CH <sub>3</sub> CN              | 10                           | 62(S)          |
| 14    | <i>D-1</i> | Et <sub>2</sub> O               | 10                           | 34(S)          |

Quantitative Dynamic Adsorption Experiments: The solvent-exchanged crystals of *D-1* (50 mg) was immersed in 2 mL of acetone solution of 1-PE at concentration of 0.5 mM

and 1.0 mM, respectively. Then, the *R* and *S* enantiomers of 1-PE in the supernatant were monitored by HPLC in terms of the peak area and ee value with the time. The results indicate that *S* enantiomers of 1-PE was encapsulated preferentially by *D*-1.

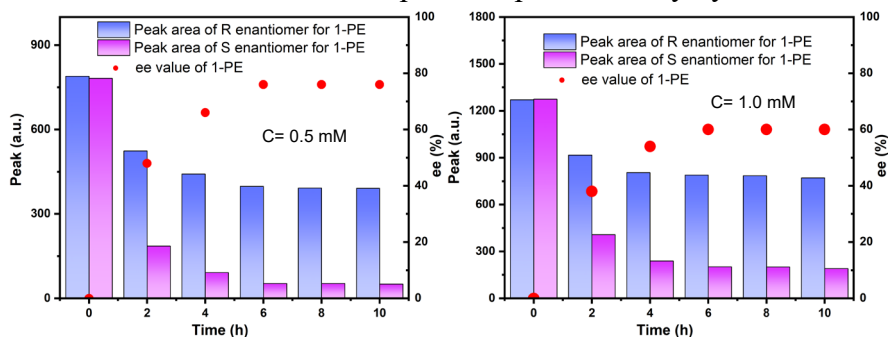

6. Figure S1. PXRD patterns of *D*-1.

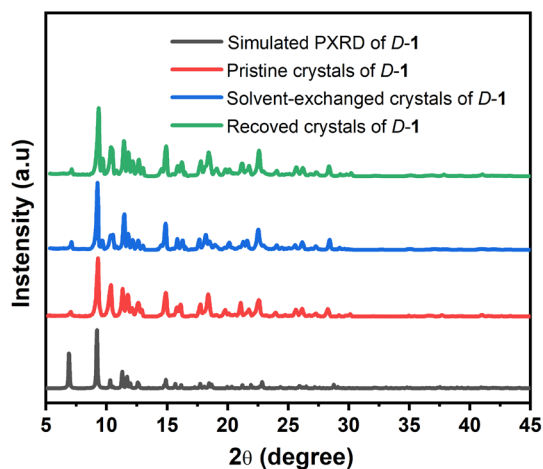

7. Figure S2. TGA curves of *D*-1.

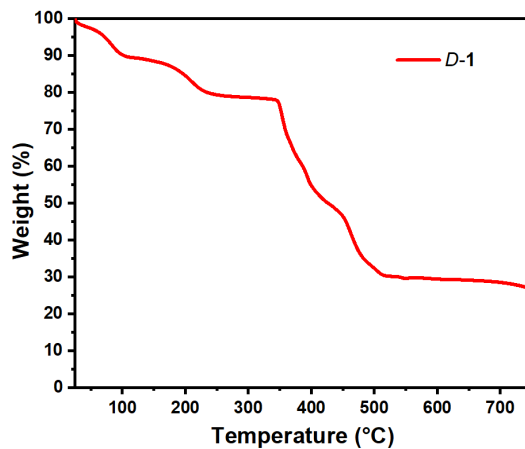

8. Figure S3. IR spectra of *D*-camH<sub>2</sub>, DPTPA and *D*-1.

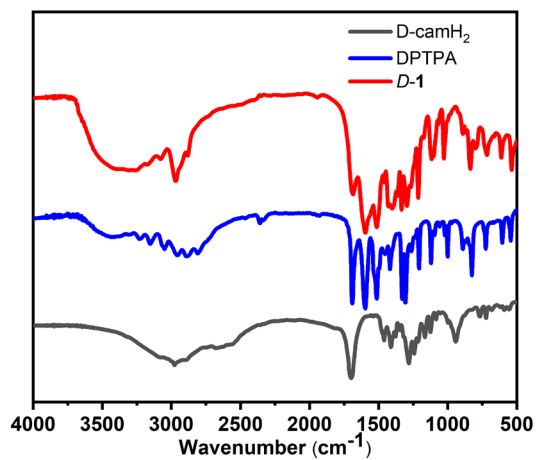

9. Figure S4. View the FL spectra of *D*-camH<sub>2</sub>, DPTPA and *D*-1, and their optical photos of under sunlight and UV light, respectively.

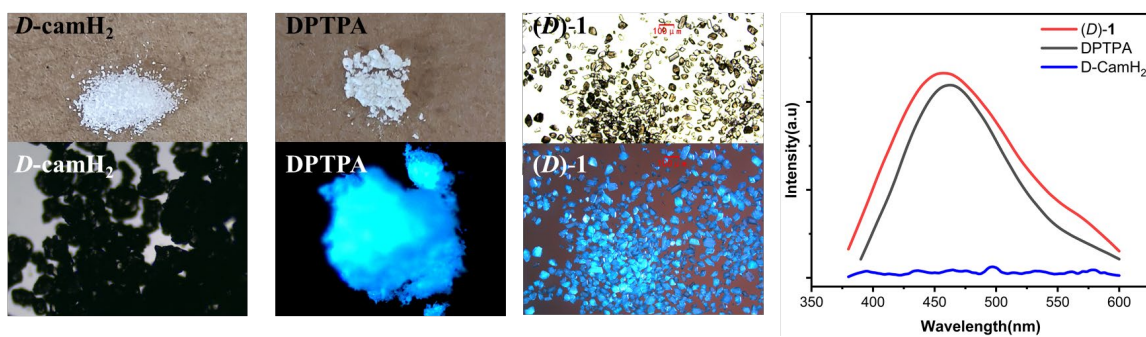

10. Figure S5. UV-vis spectra of *D*-camH<sub>2</sub>, DPTPA and *D*-1.

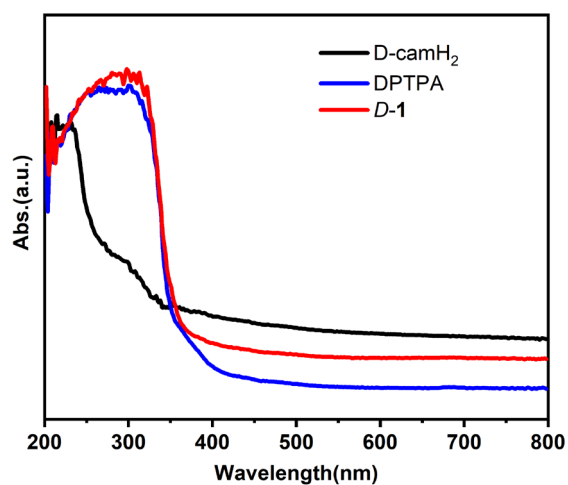

### 11. Figure S6. The adsorption of *D-1* to dye molecules.

The 20 mg pristine crystals of *D-1* were immersed in methanol solution of 10  $\mu\text{mol/L}$  4-nitrophenol and naphthol yellow S, respectively. Then the dye content in solution was monitored by UV-Vis at different time periods.

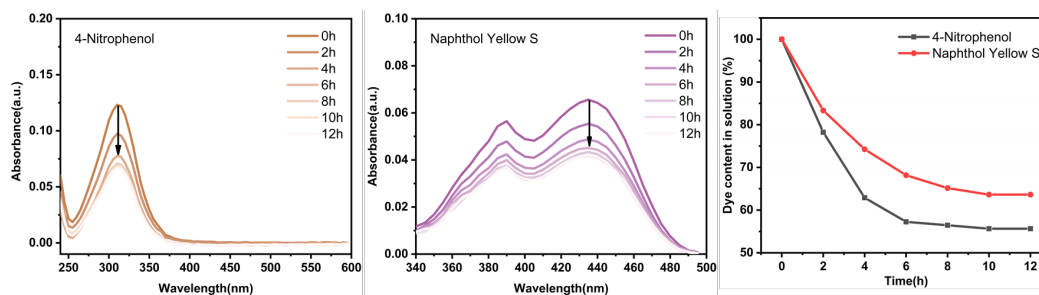

### 12. Figure S7. HPLC results of 1-phenylethanol resolved by *D-1* at different conditions (in Table S3).

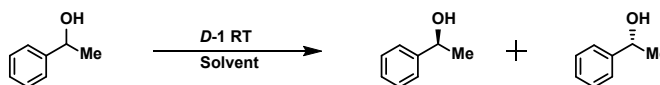

| Entry | Host       | Solvent                         | Substrate concentration (mM) | ee(%) |
|-------|------------|---------------------------------|------------------------------|-------|
| 1     | <i>D-1</i> | Acetone                         | 5                            | 99(S) |
| 2     | <i>D-1</i> | Acetone                         | 10                           | 99(S) |
| 3     | <i>D-1</i> | Acetone                         | 15                           | 95(S) |
| 4     | <i>D-1</i> | Acetone                         | 20                           | 90(S) |
| 5     | <i>D-1</i> | Acetone                         | 30                           | 84(S) |
| 6     | <i>D-1</i> | Acetone                         | 40                           | 74(S) |
| 7     | <i>L-1</i> | Acetone                         | 10                           | 99(R) |
| 8     | <i>D-1</i> | MeOH                            | 10                           | 69(S) |
| 9     | <i>D-1</i> | EtOH                            | 10                           | 50(S) |
| 10    | <i>D-1</i> | THF                             | 10                           | 39(S) |
| 11    | <i>D-1</i> | CHCl <sub>3</sub>               | 10                           | 43(S) |
| 12    | <i>D-1</i> | CH <sub>2</sub> Cl <sub>2</sub> | 10                           | 58(S) |
| 13    | <i>D-1</i> | CH <sub>3</sub> CN              | 10                           | 62(S) |
| 14    | <i>D-1</i> | Et <sub>2</sub> O               | 10                           | 34(S) |



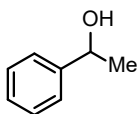

Chiral HPLC analysis: Daicel Chiralce OD: hexane/*i*-PrOH =96/4; flow rate =1.0 mL/min;

220 nm.

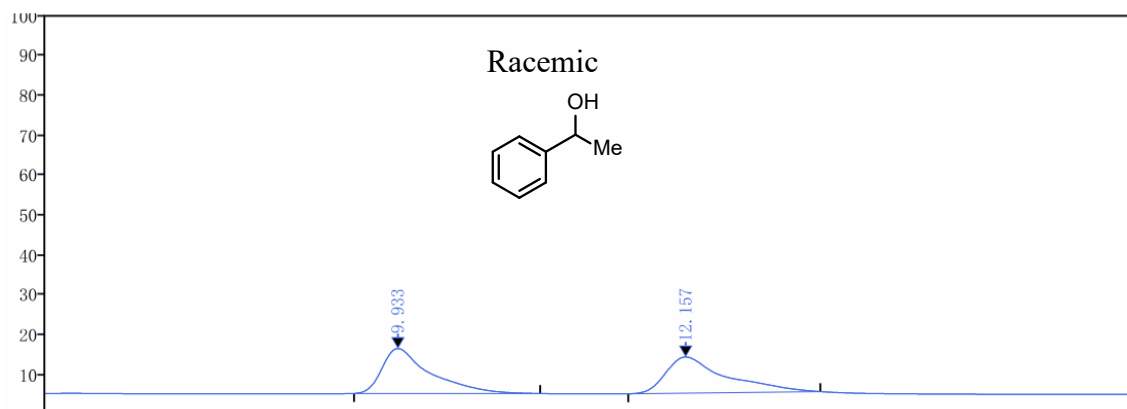

| Serial Number | Type | Retention Time [min] | Peak Area | Area % |
|---------------|------|----------------------|-----------|--------|
| 1             | MM   | 9.933                | 1248.45   | 49.97  |
| 2             | MM   | 12.157               | 1250.10   | 50.03  |
| The Total     |      |                      | 2498.55   |        |

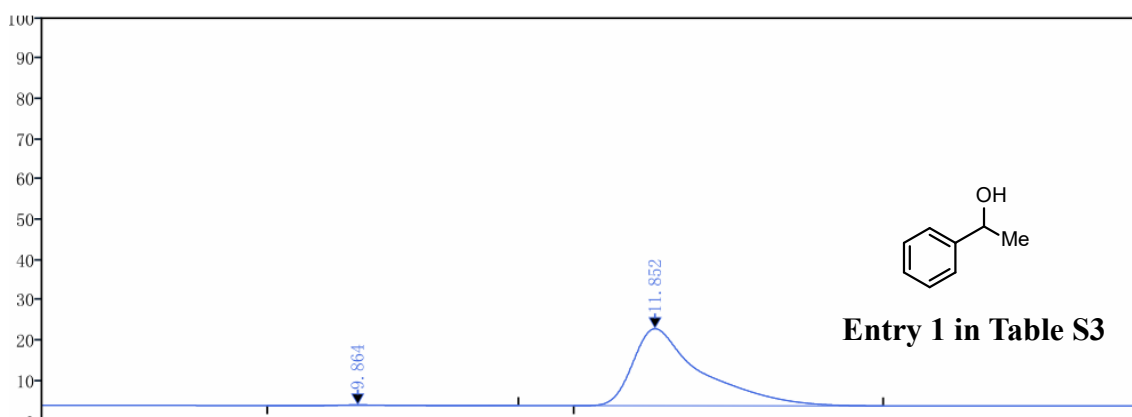

| Serial Number | Type | Retention Time [min] | Peak Area | Area % |
|---------------|------|----------------------|-----------|--------|
| 1             | MM   | 9.864                | 2.95      | 0.27   |
| 2             | MM   | 11.852               | 1079.57   | 99.73  |
| The Total     |      |                      | 1082.52   |        |

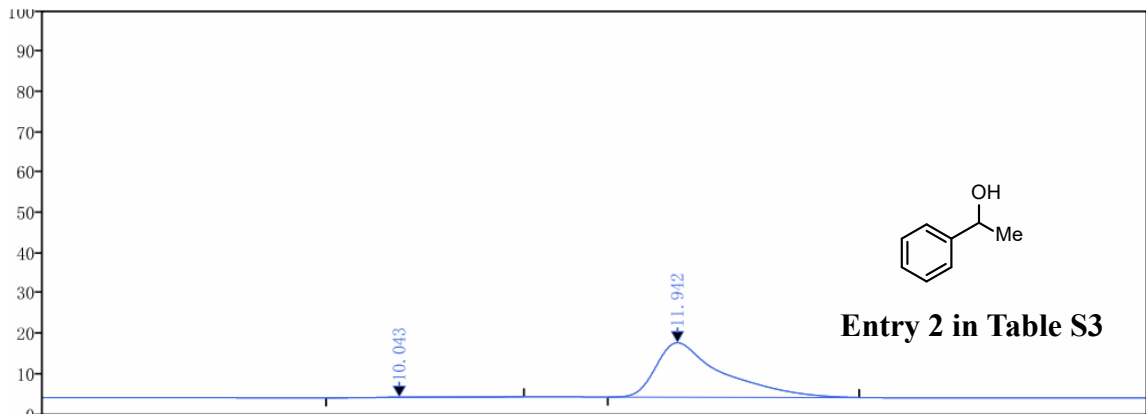

| Serial Number | Type | Retention Time [min] | Peak Area | Area % |
|---------------|------|----------------------|-----------|--------|
| 1             | MM   | 10.043               | 5.31      | 0.40   |
| 2             | BM   | 11.942               | 1328.47   | 99.60  |
| The Total     |      |                      | 1333.78   |        |

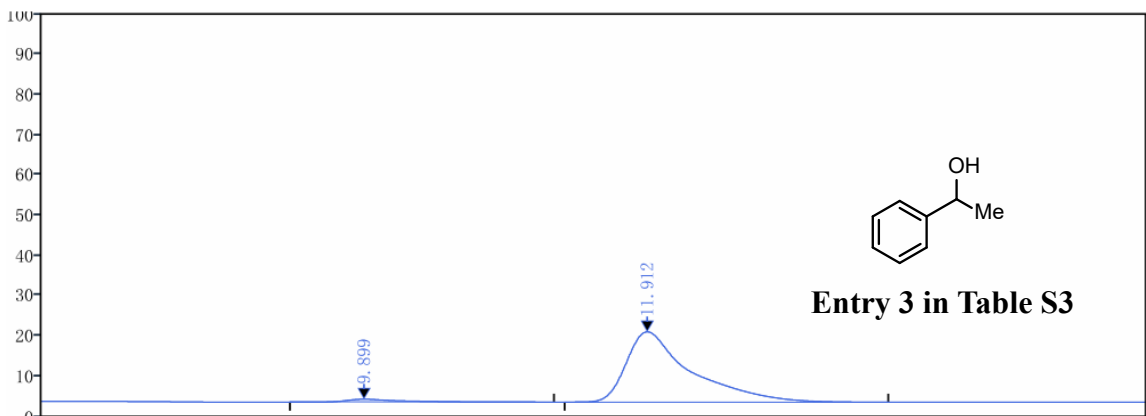

| Serial Number | Type | Retention Time [min] | Peak Area | Area % |
|---------------|------|----------------------|-----------|--------|
| 1             | MB   | 9.899                | 22.46     | 2.51   |
| 2             | BB   | 11.912               | 871.18    | 97.49  |
| The Total     |      |                      | 893.64    |        |

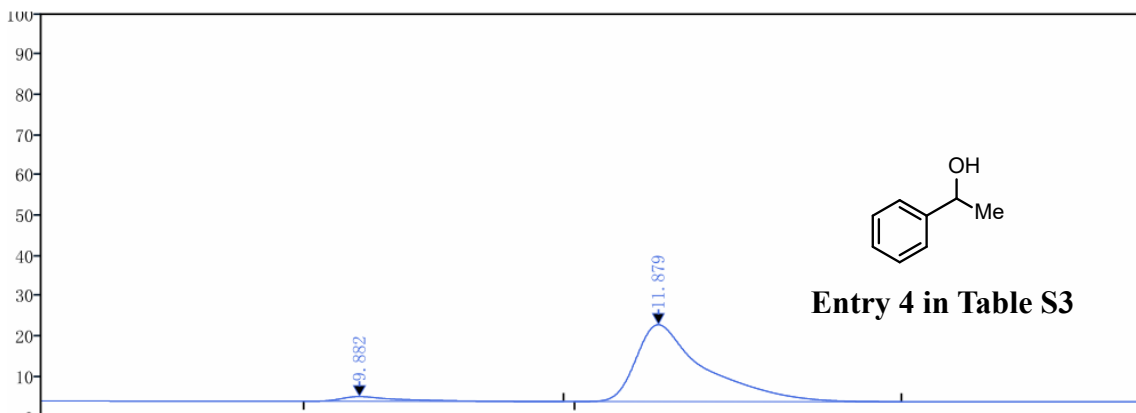

| Serial Number | Type | Retention Time [min] | Peak Area | Area % |
|---------------|------|----------------------|-----------|--------|
| 1             | BB   | 9.882                | 47.97     | 4.87   |
| 2             | BB   | 11.879               | 936.49    | 95.13  |
| The Total     |      |                      | 984.46    |        |

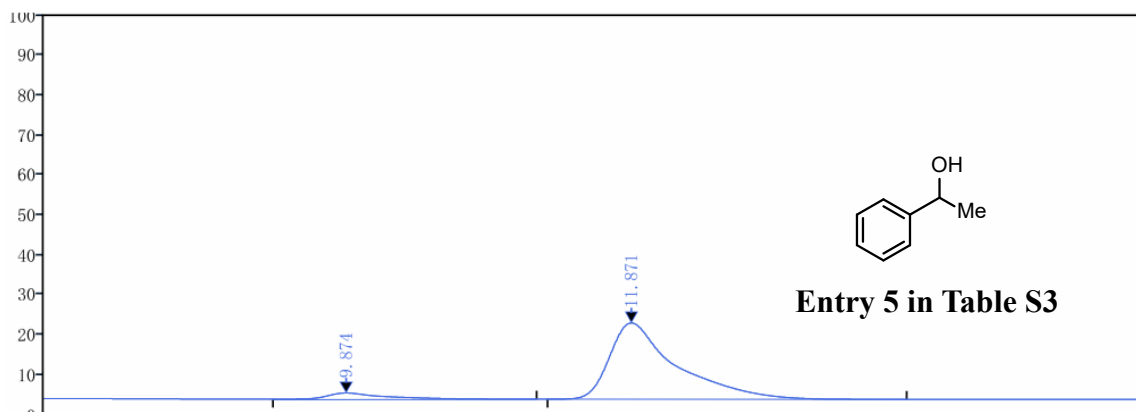

| Serial Number | Type | Retention Time [min] | Peak Area | Area % |
|---------------|------|----------------------|-----------|--------|
| 1             | MM   | 9.874                | 95.68     | 7.70   |
| 2             | BM   | 11.871               | 1147.22   | 92.30  |
| The Total     |      |                      | 1242.90   |        |

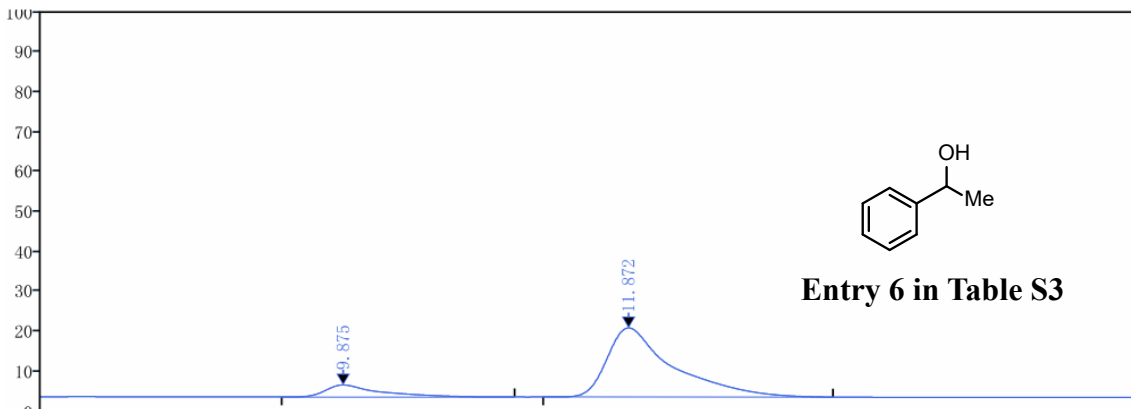

| Serial Number | Type | Retention Time [min] | Peak Area | Area % |
|---------------|------|----------------------|-----------|--------|
| 1             | MM   | 9.875                | 148.26    | 13.01  |
| 2             | MM   | 11.872               | 991.31    | 86.99  |
| The Total     |      |                      | 1139.57   |        |

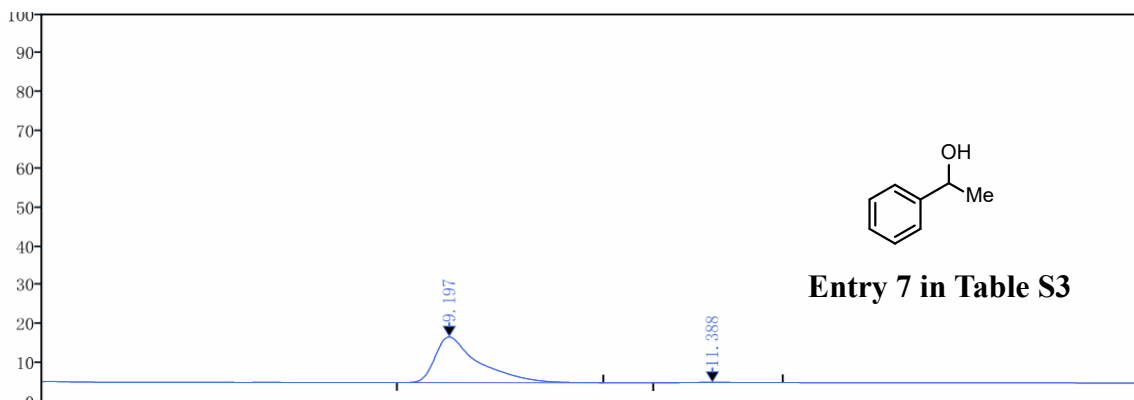

| Serial Number | Type | Retention Time [min] | Peak Area | Area % |
|---------------|------|----------------------|-----------|--------|
| 1             | BM   | 9.197                | 1743.25   | 99.56  |
| 2             | MM   | 11.388               | 7.72      | 0.44   |
| The Total     |      |                      | 1750.97   |        |

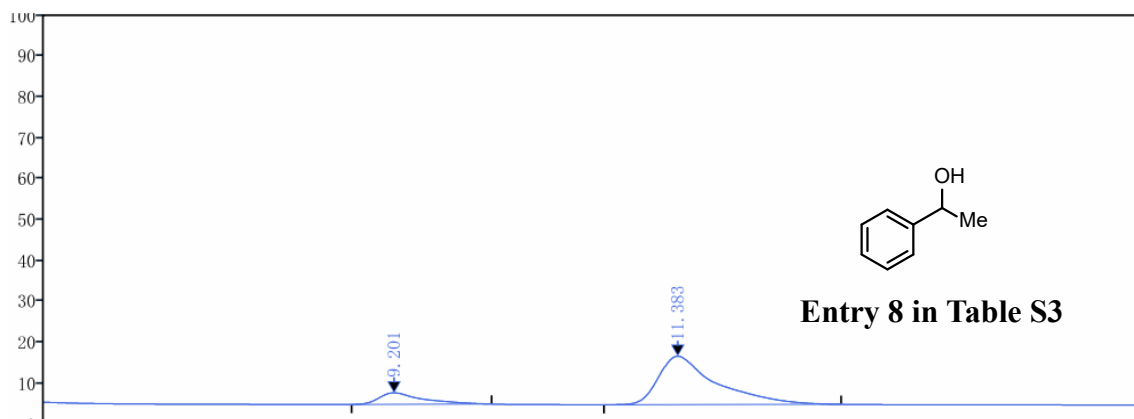

| Serial Number | Type | Retention Time [min] | Peak Area | Area % |
|---------------|------|----------------------|-----------|--------|
| 1             | MM   | 9.201                | 248.79    | 15.22  |
| 2             | BM   | 11.383               | 1386.05   | 84.78  |
| The Total     |      |                      | 1634.84   |        |

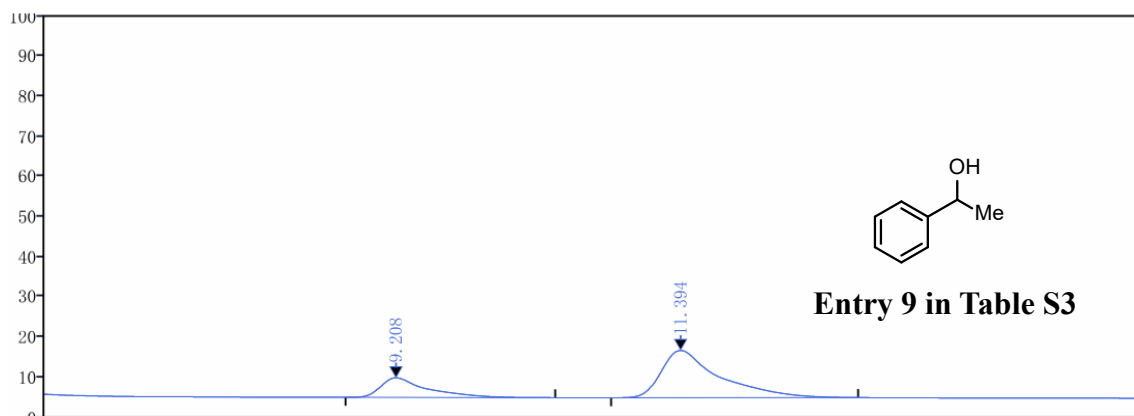

| Serial Number | Type | Retention Time [min] | Peak Area | Area % |
|---------------|------|----------------------|-----------|--------|
| 1             | BB   | 9.208                | 179.49    | 24.99  |
| 2             | BM   | 11.394               | 538.72    | 75.01  |
| The Total     |      |                      | 718.21    |        |

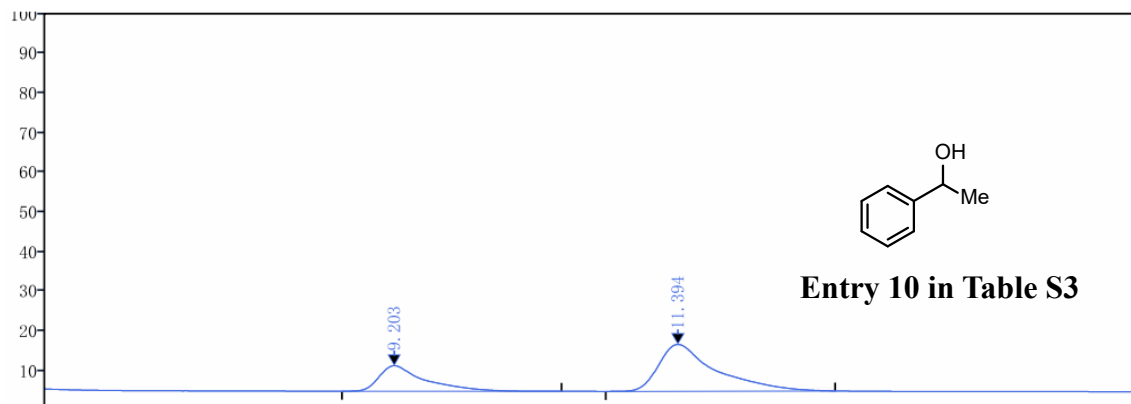

| Serial Number | Type | Retention Time [min] | Peak Area | Area % |
|---------------|------|----------------------|-----------|--------|
| 1             | BB   | 9.203                | 655.23    | 30.46  |
| 2             | BM   | 11.394               | 1496.14   | 69.54  |
| The Total     |      |                      | 2151.37   |        |

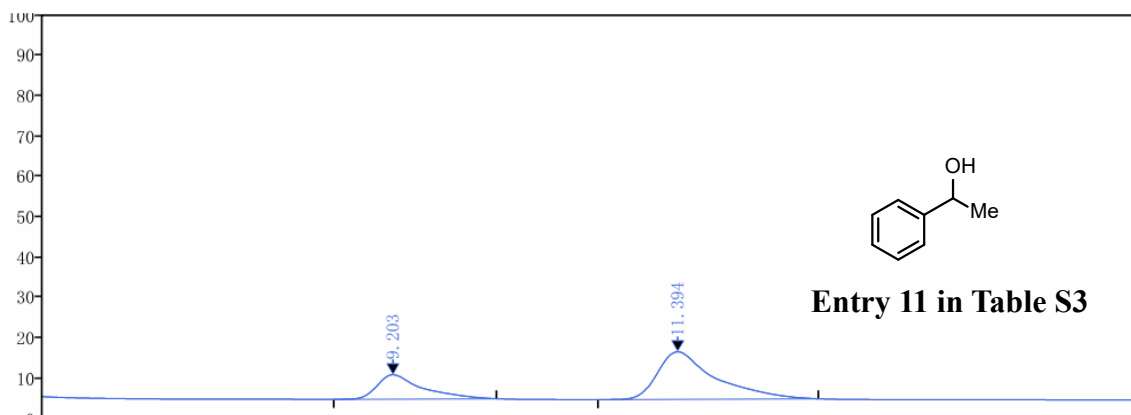

| Serial Number | Type | Retention Time [min] | Peak Area | Area % |
|---------------|------|----------------------|-----------|--------|
| 1             | BM   | 9.203                | 335.04    | 28.61  |
| 2             | BM   | 11.394               | 835.99    | 71.39  |
| The Total     |      |                      | 1171.03   |        |

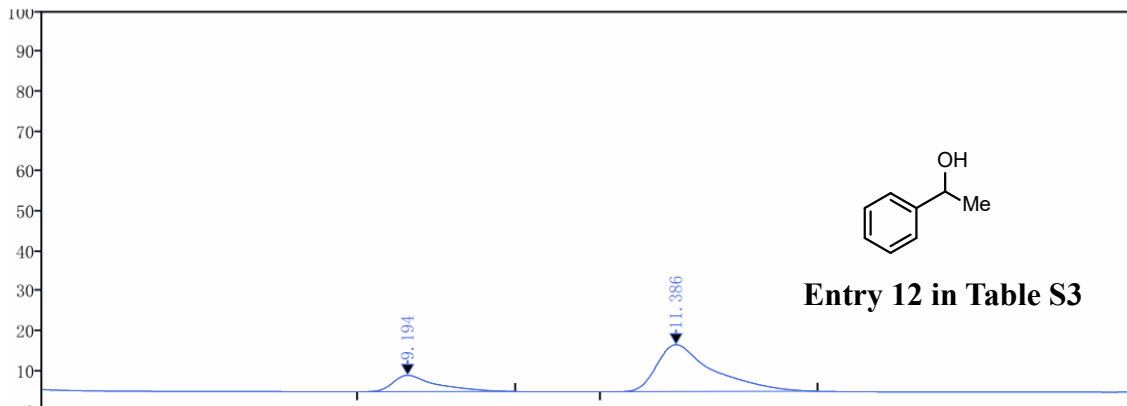

| Serial Number | Type | Retention Time [min] | Peak Area | Area % |
|---------------|------|----------------------|-----------|--------|
| 1             | BM   | 9.194                | 1020.13   | 21.05  |
| 2             | BM   | 11.386               | 3826.95   | 78.95  |
| The Total     |      |                      | 4847.08   |        |

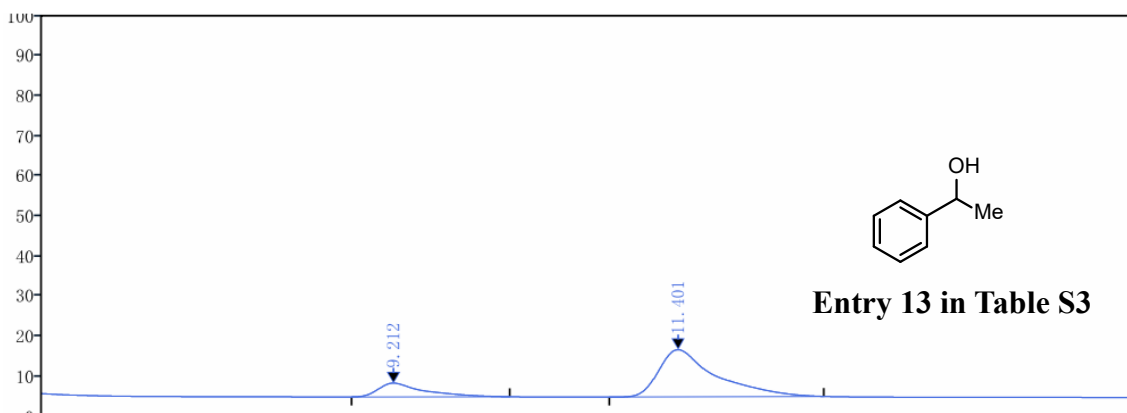

| Serial Number | Type | Retention Time [min] | Peak Area | Area % |
|---------------|------|----------------------|-----------|--------|
| 1             | MM   | 9.212                | 179.30    | 18.88  |
| 2             | BM   | 11.401               | 770.56    | 81.12  |
| The Total     |      |                      | 949.86    |        |

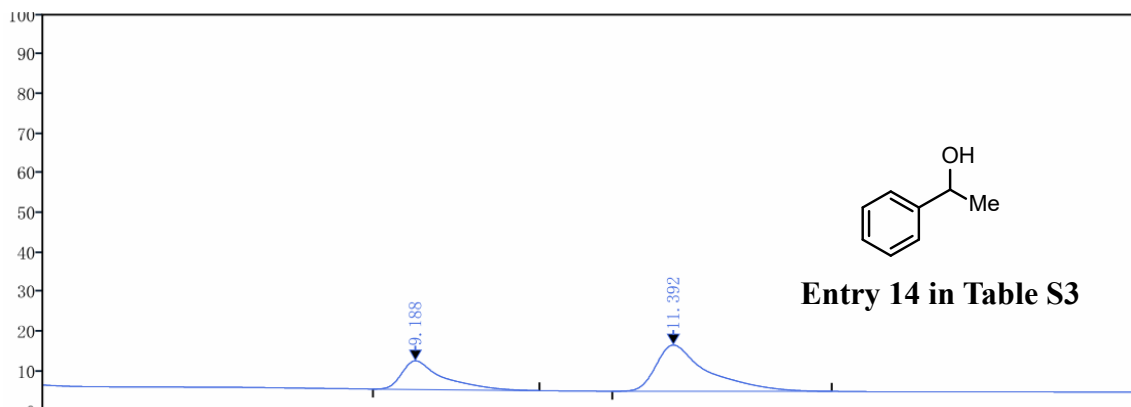

| Serial Number | Type | Retention Time [min] | Peak Area | Area % |
|---------------|------|----------------------|-----------|--------|
| 1             | BM   | 9.188                | 231.36    | 33.06  |
| 2             | BM   | 11.392               | 468.46    | 66.94  |
| The Total     |      |                      | 699.82    |        |

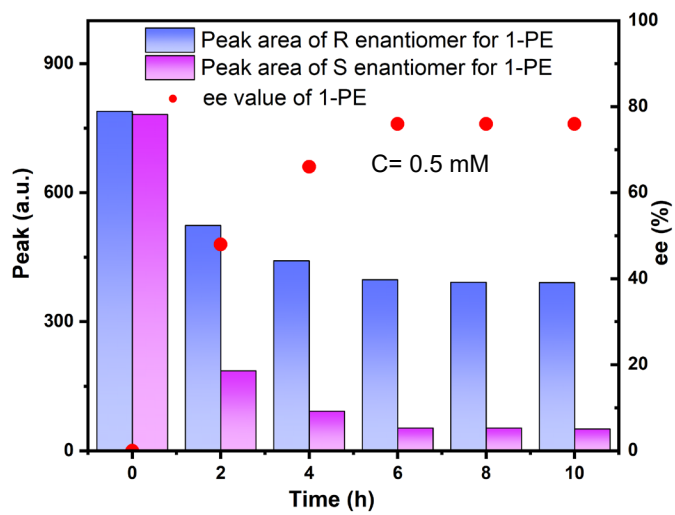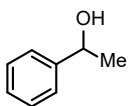

Chiral HPLC analysis: Daicel Chiralce OD: hexane/*i*-PrOH =96/4; flow rate =1.0 mL/min;

220 nm.



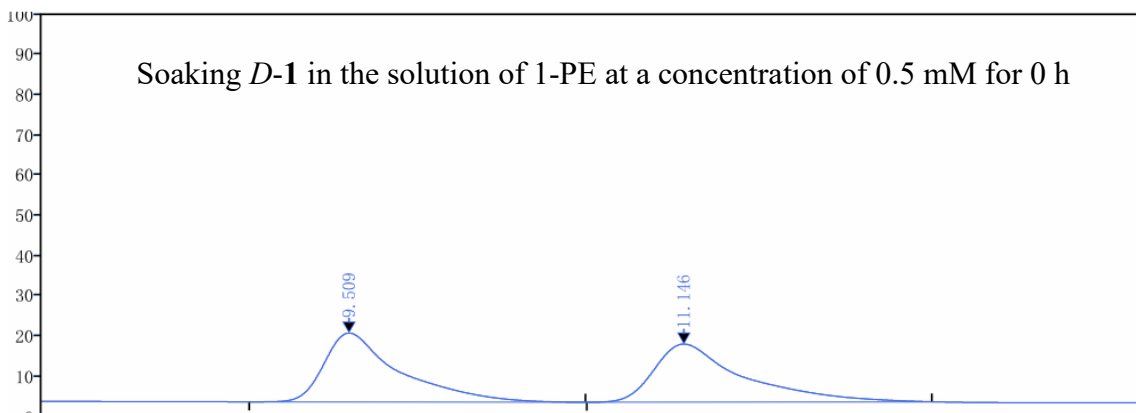

| Serial Number | Type | Retention Time [min] | Peak Area | Area % |
|---------------|------|----------------------|-----------|--------|
| 1             | BB   | 9.509                | 789.19    | 50.22  |
| 2             | BM   | 11.146               | 782.38    | 49.78  |
| The Total     |      |                      | 1571.57   |        |

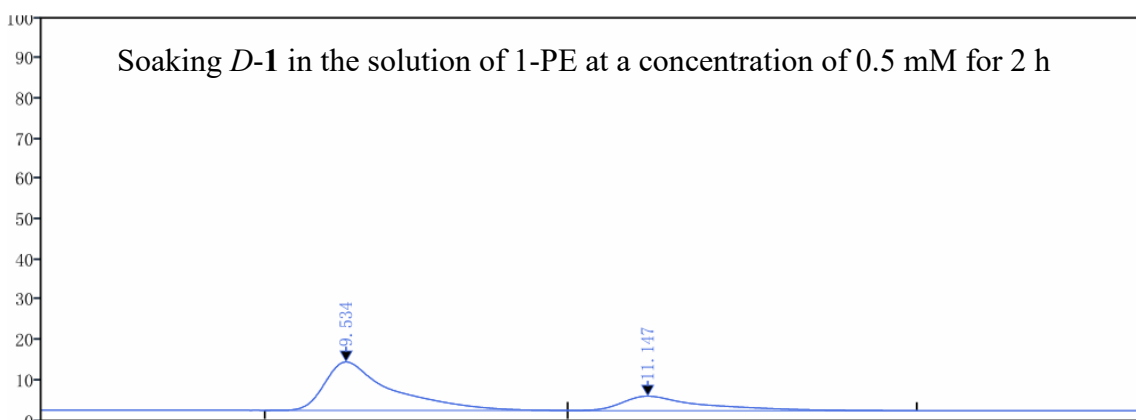

| Serial Number | Type | Retention Time [min] | Peak Area | Area % |
|---------------|------|----------------------|-----------|--------|
| 1             | BM   | 9.534                | 524.03    | 73.78  |
| 2             | MB   | 11.147               | 186.22    | 26.22  |
| The Total     |      |                      | 710.25    |        |

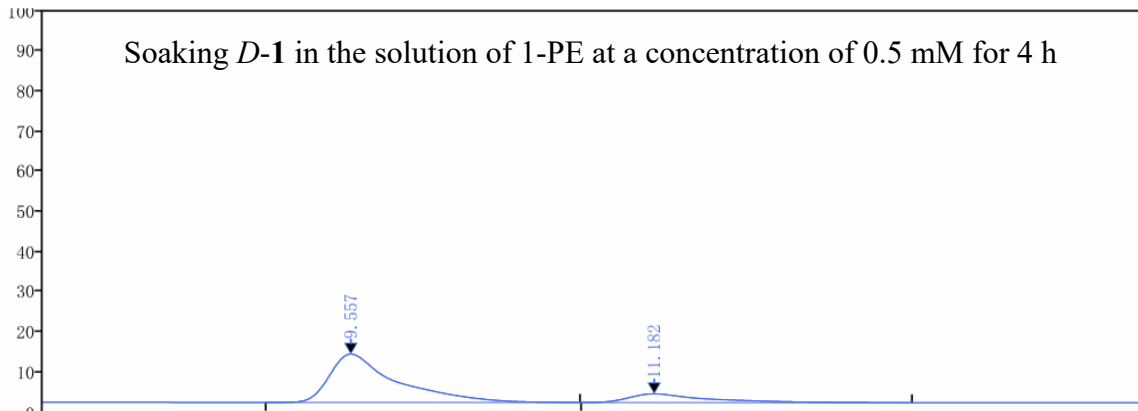

| Serial Number | Type | Retention Time [min] | Peak Area | Area % |
|---------------|------|----------------------|-----------|--------|
| 1             | BB   | 9.557                | 441.85    | 82.83  |
| 2             | BB   | 11.182               | 91.61     | 17.17  |
| The Total     |      |                      | 533.46    |        |

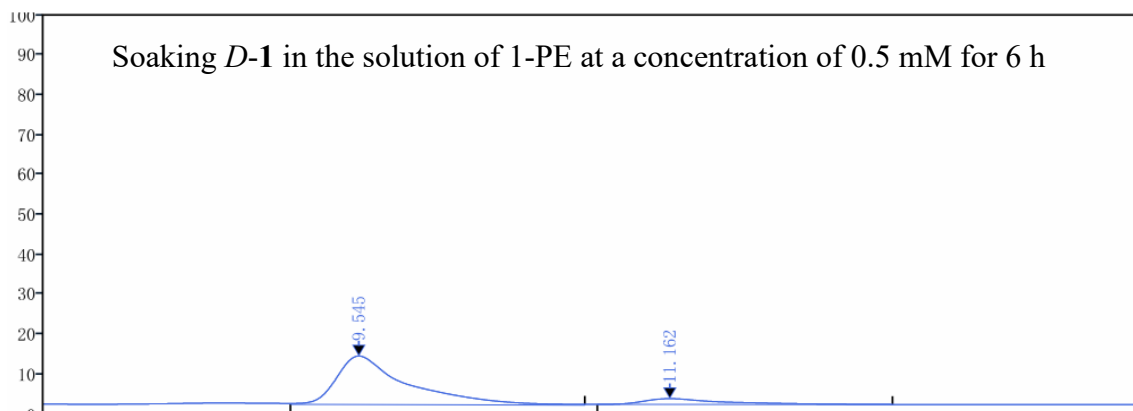

| Serial Number | Type | Retention Time [min] | Peak Area | Area % |
|---------------|------|----------------------|-----------|--------|
| 1             | MM   | 9.545                | 398.75    | 88.18  |
| 2             | MM   | 11.162               | 53.45     | 11.82  |
| The Total     |      |                      | 452.20    |        |

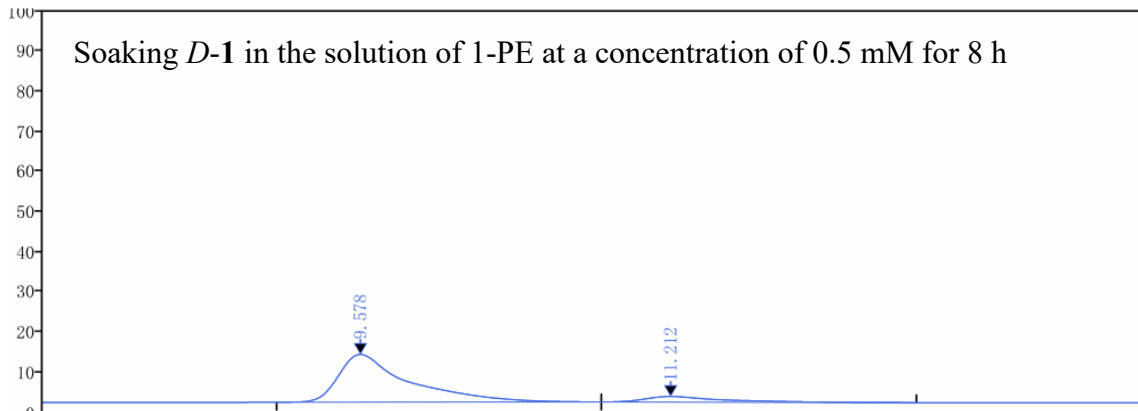

| Serial Number | Type | Retention Time [min] | Peak Area | Area % |
|---------------|------|----------------------|-----------|--------|
| 1             | MM   | 9.578                | 392.28    | 88.02  |
| 2             | BM   | 11.212               | 53.40     | 11.98  |
| The Total     |      |                      | 445.68    |        |

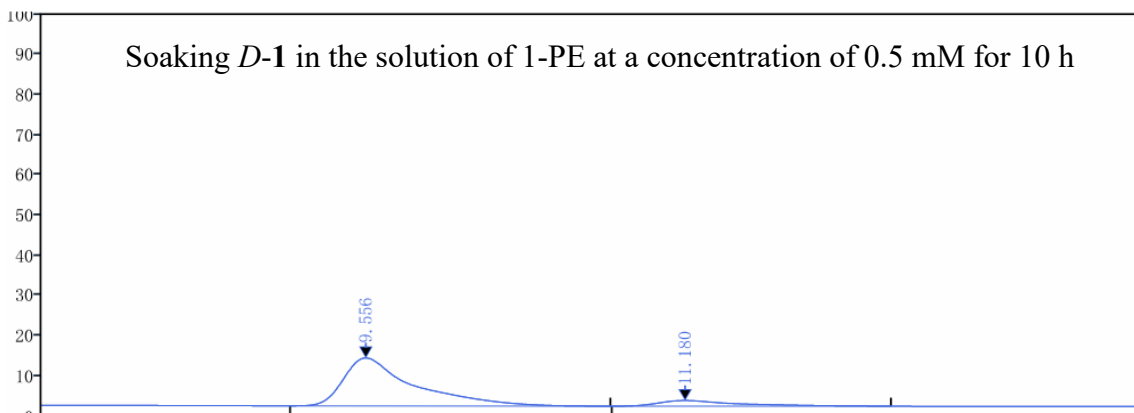

| Serial Number | Type | Retention Time [min] | Peak Area | Area % |
|---------------|------|----------------------|-----------|--------|
| 1             | BB   | 9.556                | 391.80    | 88.40  |
| 2             | BM   | 11.180               | 51.43     | 11.60  |
| The Total     |      |                      | 443.23    |        |

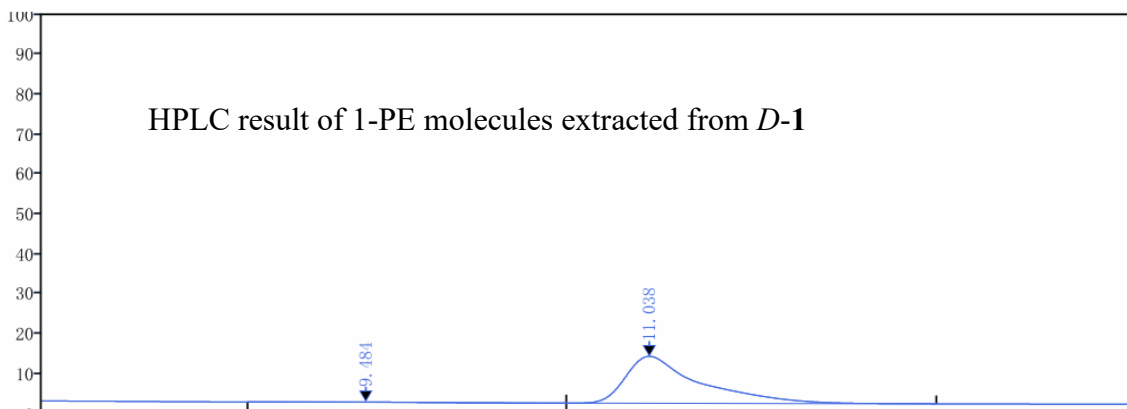

| Serial Number | Type | Retention Time [min] | Peak Area | Area % |
|---------------|------|----------------------|-----------|--------|
| 1             | MM   | 9.484                | 0.52      | 0.14   |
| 2             | BM   | 11.038               | 380.95    | 99.86  |
| The Total     |      |                      | 381.47    |        |

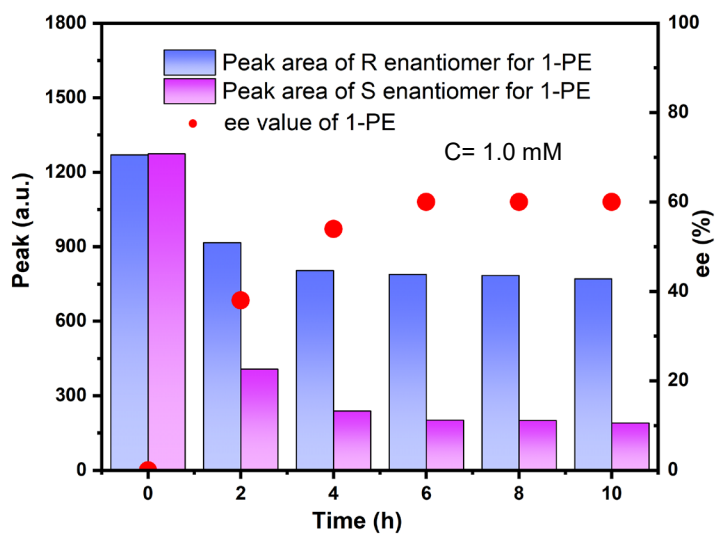

Chiral HPLC analysis: Daicel Chiralce OD: hexane/*i*-PrOH =96/4; flow rate =1.0 mL/min;

220 nm.

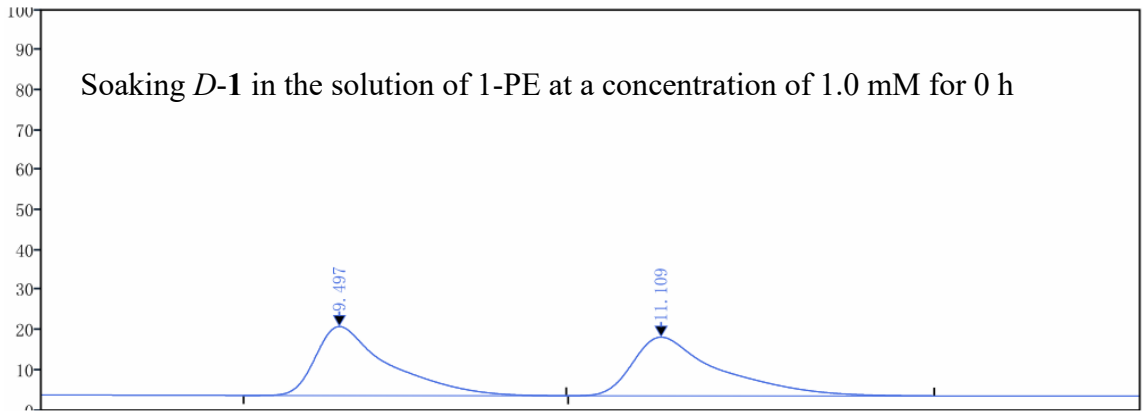

| Serial Number | Type | Retention Time [min] | Peak Area | Area % |
|---------------|------|----------------------|-----------|--------|
| 1             | BB   | 9.497                | 1270.03   | 49.92  |
| 2             | BM   | 11.109               | 1274.17   | 50.08  |
| The Total     |      |                      | 2544.20   |        |

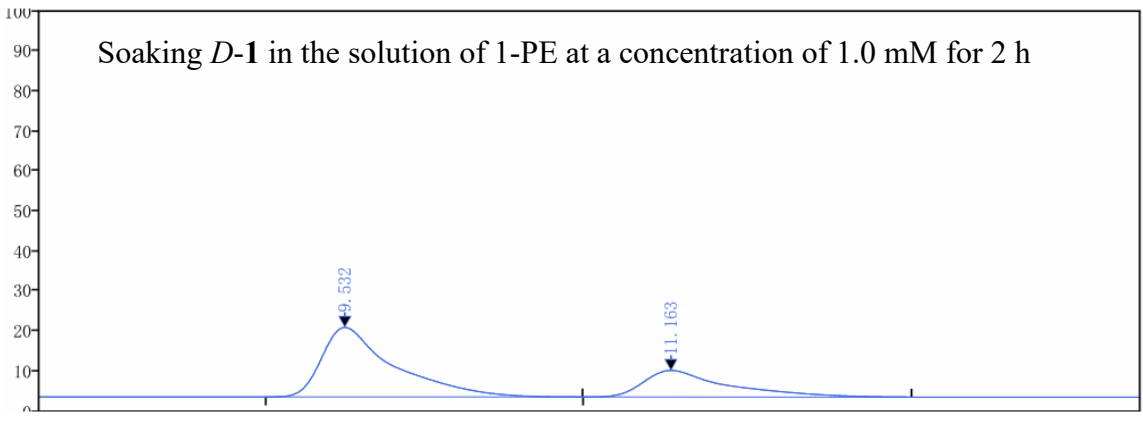

| Serial Number | Type | Retention Time [min] | Peak Area | Area % |
|---------------|------|----------------------|-----------|--------|
| 1             | MB   | 9.532                | 917.98    | 69.23  |
| 2             | BM   | 11.163               | 407.98    | 30.77  |
| The Total     |      |                      | 1325.96   |        |

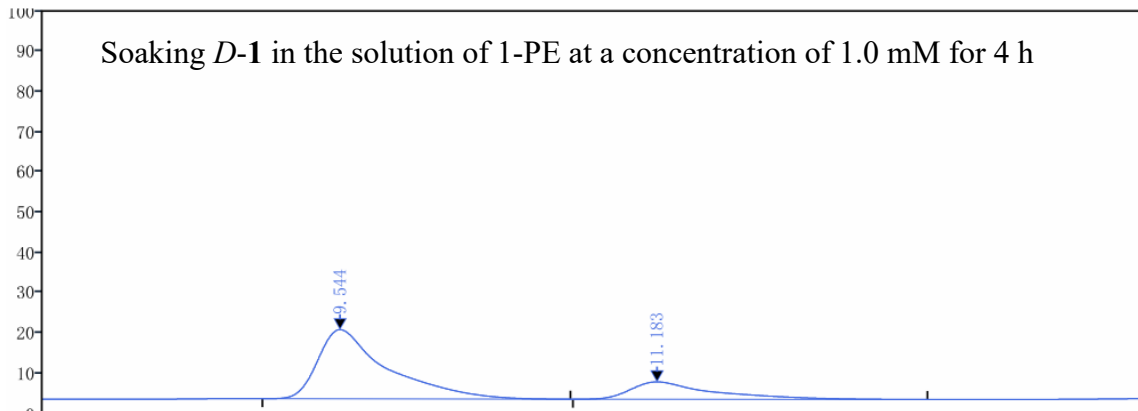

| Serial Number | Type | Retention Time [min] | Peak Area | Area % |
|---------------|------|----------------------|-----------|--------|
| 1             | BB   | 9.544                | 805.48    | 77.08  |
| 2             | BB   | 11.183               | 239.57    | 22.92  |
| The Total     |      |                      | 1045.05   |        |

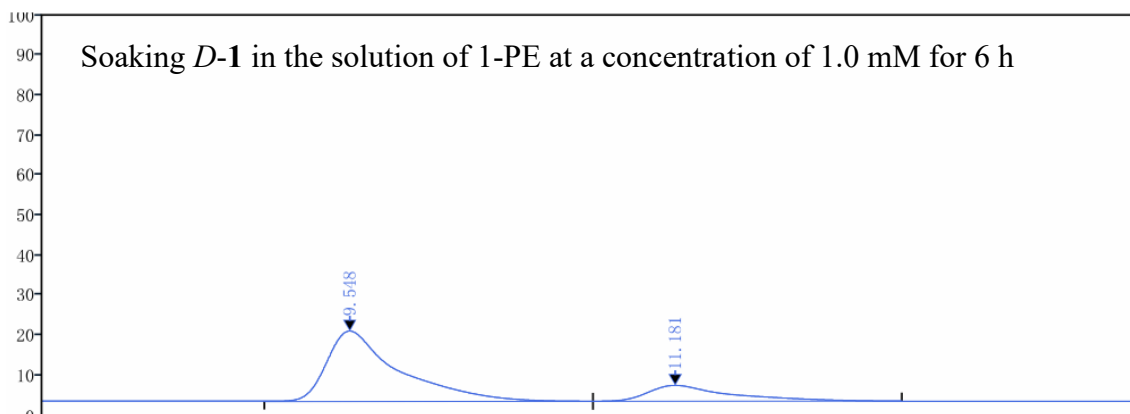

| Serial Number | Type | Retention Time [min] | Peak Area | Area % |
|---------------|------|----------------------|-----------|--------|
| 1             | MM   | 9.548                | 789.67    | 79.61  |
| 2             | BM   | 11.181               | 202.27    | 20.39  |
| The Total     |      |                      | 991.94    |        |

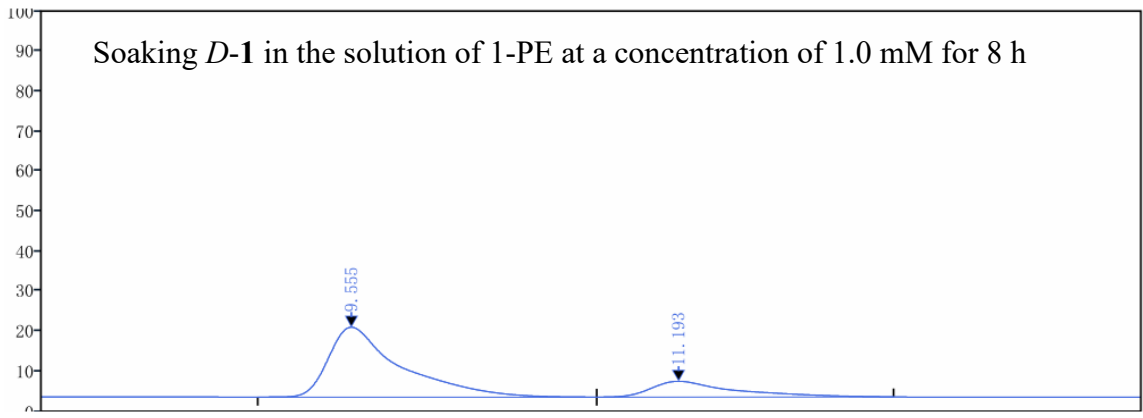

| Serial Number | Type | Retention Time [min] | Peak Area | Area % |
|---------------|------|----------------------|-----------|--------|
| 1             | MB   | 9.555                | 785.66    | 79.59  |
| 2             | BM   | 11.193               | 201.51    | 20.41  |
| The Total     |      |                      | 987.17    |        |

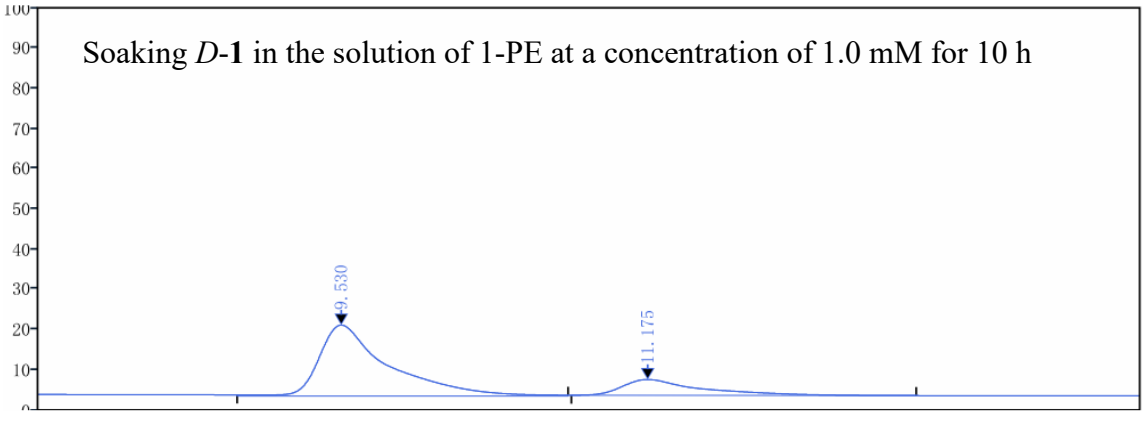

| Serial Number | Type | Retention Time [min] | Peak Area | Area % |
|---------------|------|----------------------|-----------|--------|
| 1             | MM   | 9.530                | 771.40    | 80.15  |
| 2             | MM   | 11.175               | 190.99    | 19.85  |
| The Total     |      |                      | 962.39    |        |

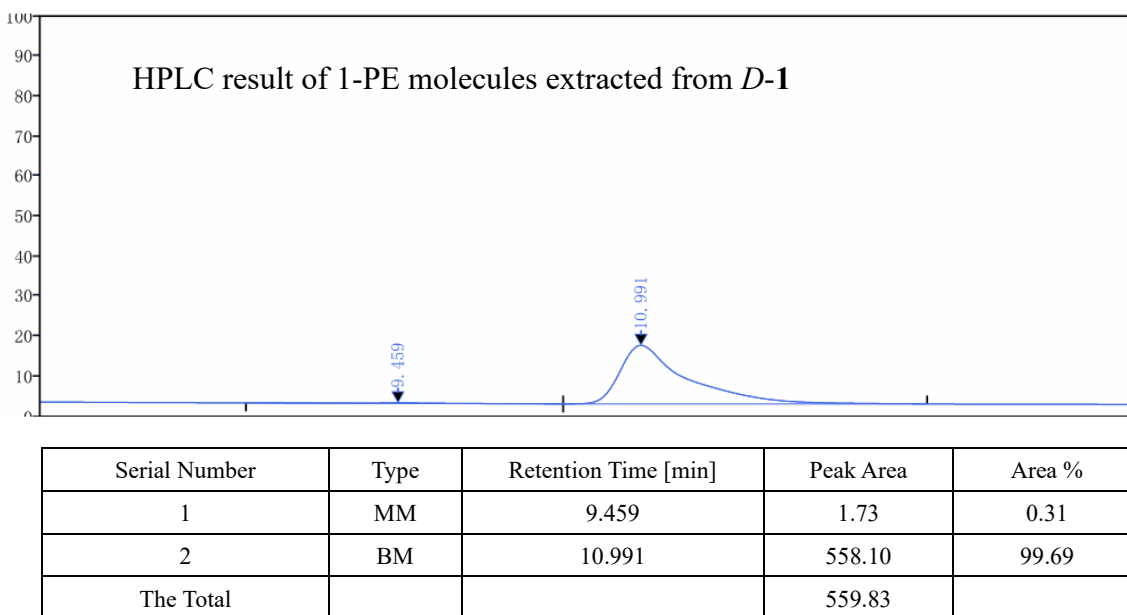

**13. Figure S8. HPLC results of chiral molecules resolved by *D-1* (in Figure 2 and 3).**

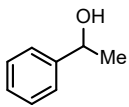

Chiral HPLC analysis: Daicel Chiralce OD: hexane/*i*-PrOH =96/4; flow rate =1.0 mL/min;

220 nm;

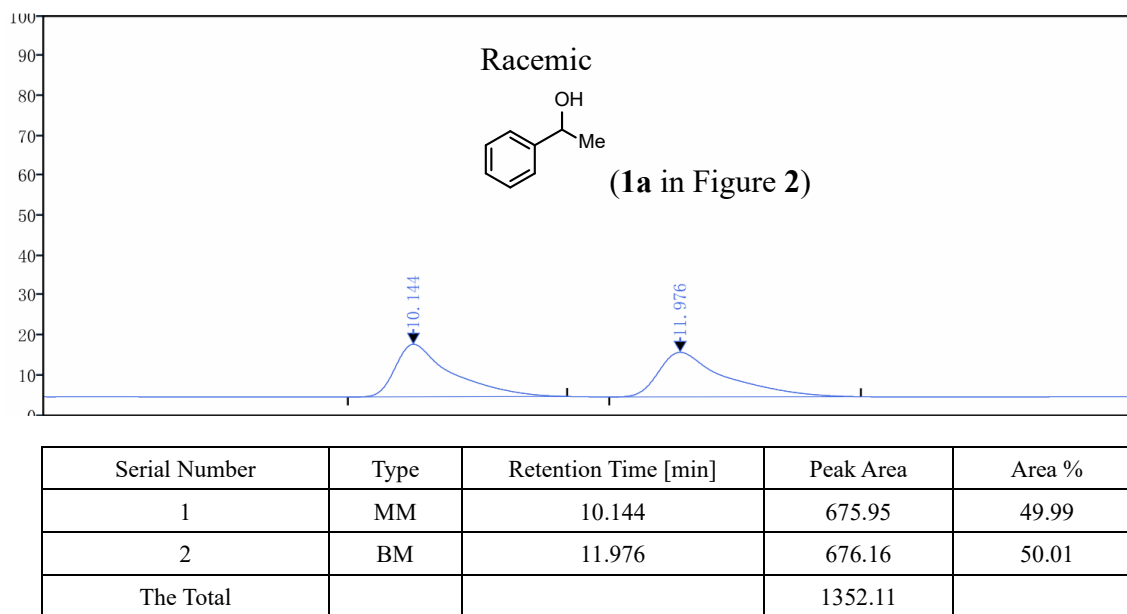



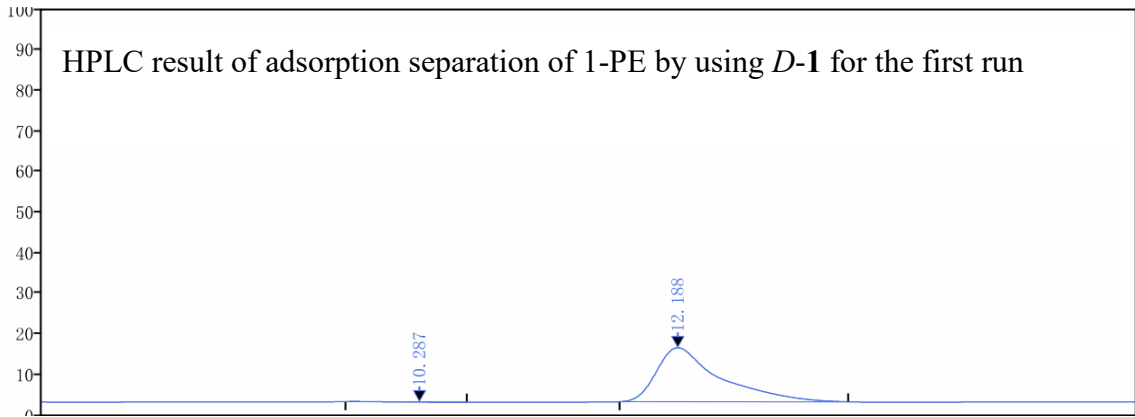

| Serial Number | Type | Retention Time [min] | Peak Area | Area % |
|---------------|------|----------------------|-----------|--------|
| 1             | MM   | 10.287               | 0.60      | 0.09   |
| 2             | MM   | 12.188               | 691.87    | 99.91  |
| The Total     |      |                      | 692.47    |        |

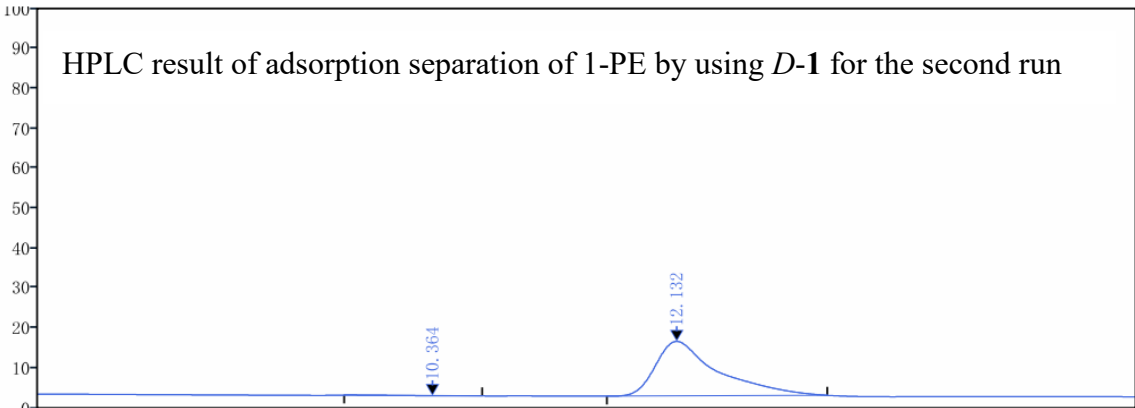

| Serial Number | Type | Retention Time [min] | Peak Area | Area % |
|---------------|------|----------------------|-----------|--------|
| 1             | MM   | 10.364               | 0.80      | 0.21   |
| 2             | BM   | 12.132               | 388.26    | 99.79  |
| The Total     |      |                      | 389.06    |        |

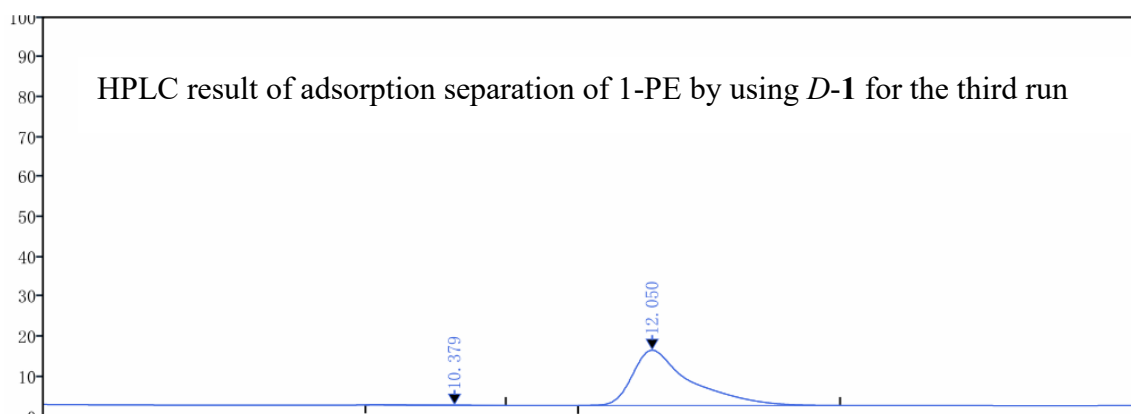

| Serial Number | Type | Retention Time [min] | Peak Area | Area % |
|---------------|------|----------------------|-----------|--------|
| 1             | MM   | 10.379               | 2.21      | 0.18   |
| 2             | BB   | 12.050               | 1252.99   | 99.82  |
| The Total     |      |                      | 1255.20   |        |

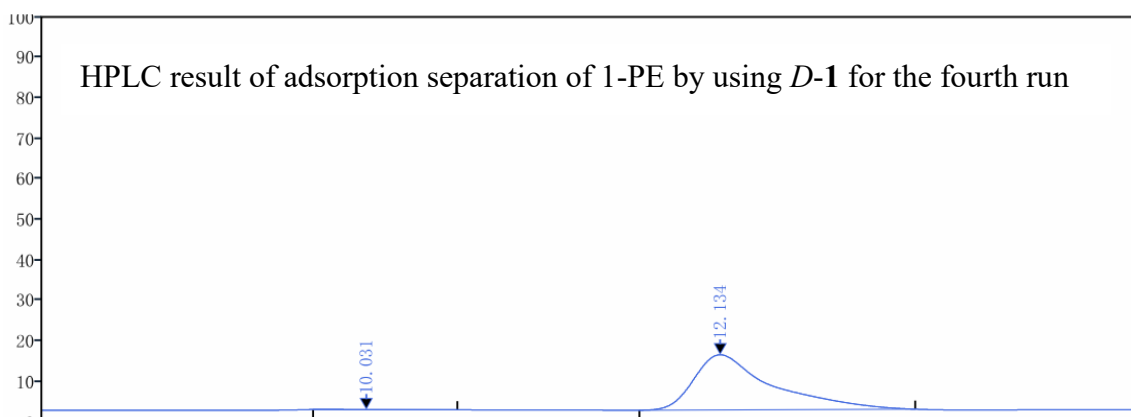

| Serial Number | Type | Retention Time [min] | Peak Area | Area % |
|---------------|------|----------------------|-----------|--------|
| 1             | MM   | 10.031               | 0.44      | 0.06   |
| 2             | MM   | 12.134               | 767.23    | 99.94  |
| The Total     |      |                      | 767.67    |        |

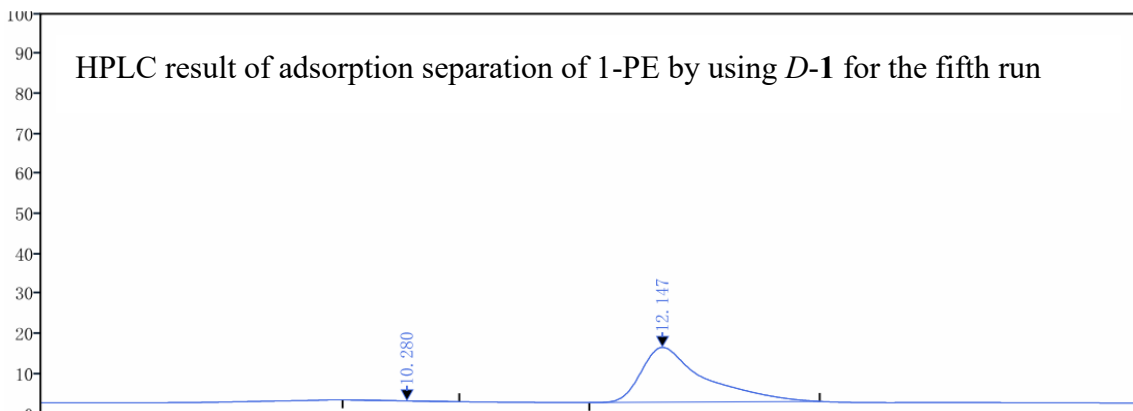

| Serial Number | Type | Retention Time [min] | Peak Area | Area % |
|---------------|------|----------------------|-----------|--------|
| 1             | MM   | 10.280               | 0.78      | 0.12   |
| 2             | BM   | 12.147               | 675.73    | 99.88  |
| The Total     |      |                      | 676.51    |        |

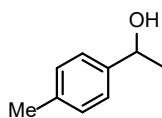

Chiral HPLC analysis: Daicel Chiralce AD: hexane/*i*-PrOH =95/5; flow rate =1.0 mL/min; 220 nm;

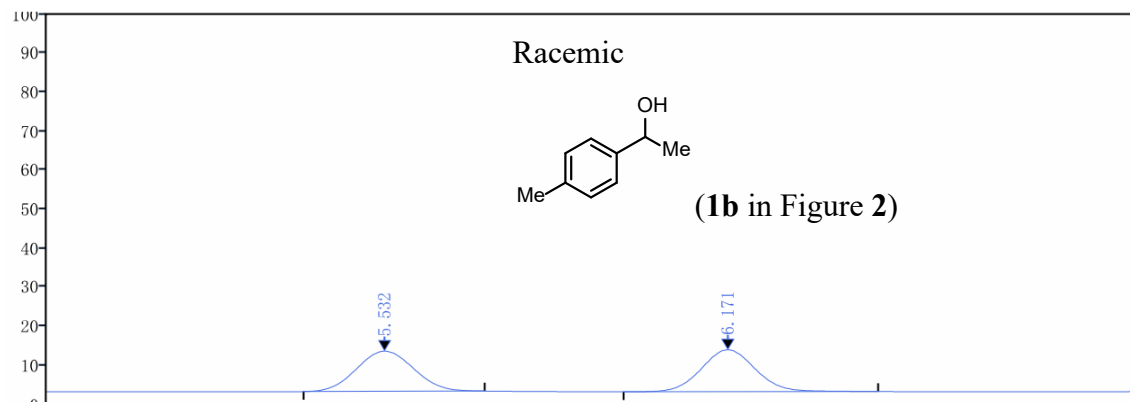

| Serial Number | Type | Retention Time [min] | Peak Area | Area % |
|---------------|------|----------------------|-----------|--------|
| 1             | MM   | 5.532                | 1793.80   | 50.30  |
| 2             | BM   | 6.171                | 1772.62   | 49.70  |
| The Total     |      |                      | 3566.42   |        |

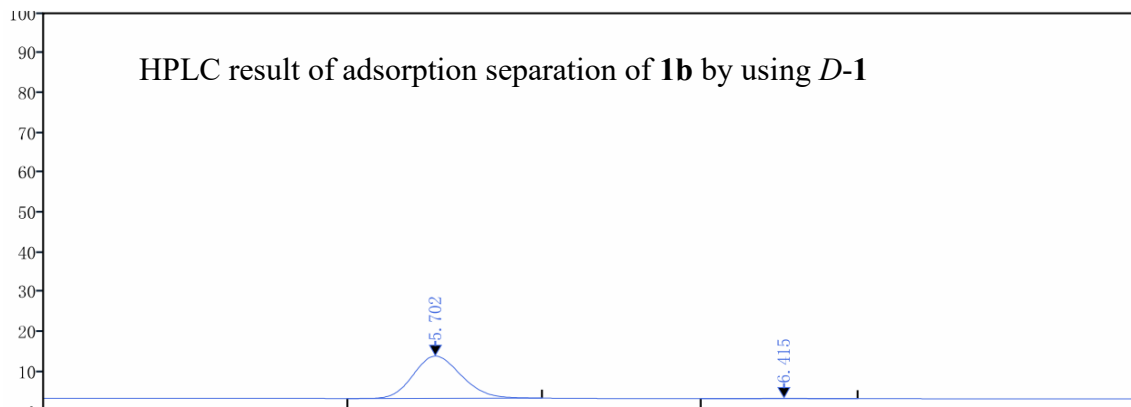

| Serial Number | Type | Retention Time [min] | Peak Area | Area % |
|---------------|------|----------------------|-----------|--------|
| 1             | MM   | 5.702                | 1045.70   | 99.15  |
| 2             | MM   | 6.415                | 8.99      | 0.85   |
| The Total     |      |                      | 1054.69   |        |

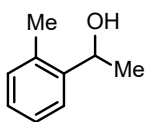

Chiral HPLC analysis: Daicel Chiralce AD: hexane/*i*-PrOH =97/3; flow rate =1.0 mL/min; 220 nm;

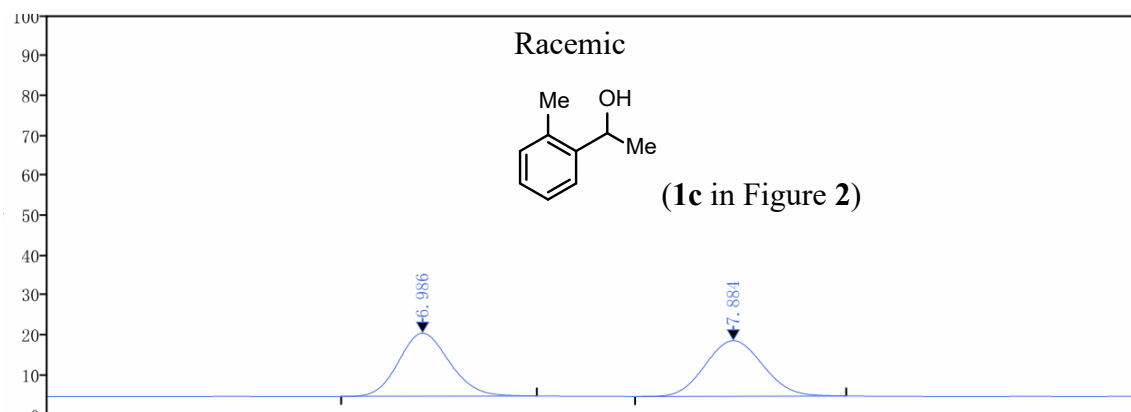

| Serial Number | Type | Retention Time [min] | Peak Area | Area % |
|---------------|------|----------------------|-----------|--------|
| 1             | MM   | 6.986                | 2758.14   | 50.07  |
| 2             | BM   | 7.884                | 2749.99   | 49.93  |
| The Total     |      |                      | 5508.13   |        |

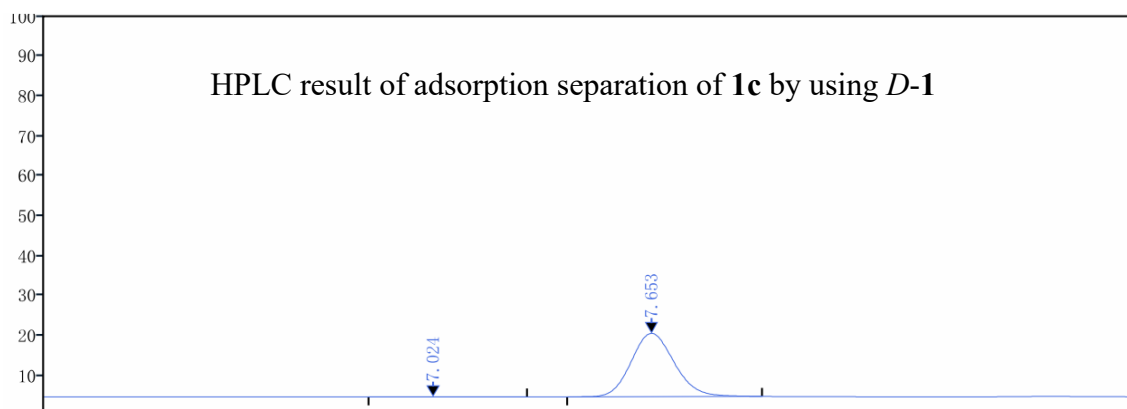

| Serial Number | Type | Retention Time [min] | Peak Area | Area % |
|---------------|------|----------------------|-----------|--------|
| 1             | MM   | 7.024                | 0.80      | 0.02   |
| 2             | BM   | 7.653                | 3240.77   | 99.98  |
| The Total     |      |                      | 3241.57   |        |

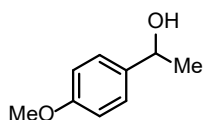

Chiral HPLC analysis: Daicel Chiralce OD: hexane/*i*-PrOH =97/3; flow rate =1.0 mL/min; 220 nm;

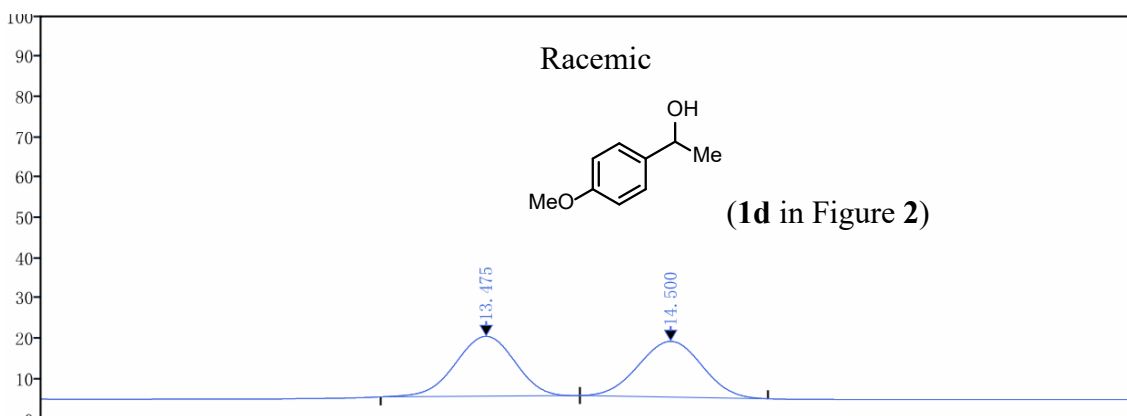

| Serial Number | Type | Retention Time [min] | Peak Area | Area % |
|---------------|------|----------------------|-----------|--------|
| 1             | MM   | 13.475               | 2018.40   | 50.05  |
| 2             | MM   | 14.500               | 2014.61   | 49.95  |
| The Total     |      |                      | 4033.01   |        |

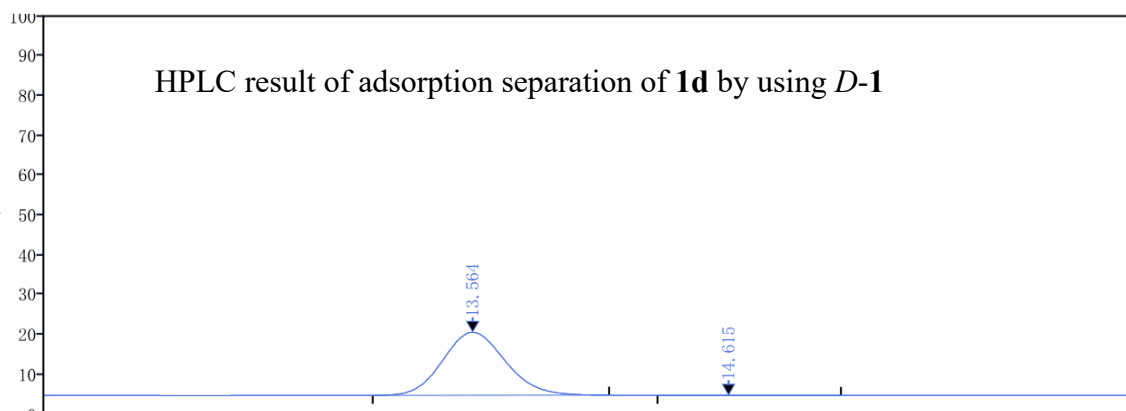

| Serial Number | Type | Retention Time [min] | Peak Area | Area % |
|---------------|------|----------------------|-----------|--------|
| 1             | MM   | 13.564               | 603.80    | 99.89  |
| 2             | MM   | 14.615               | 0.63      | 0.11   |
| The Total     |      |                      | 604.43    |        |

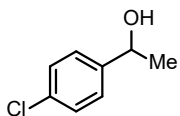

Chiral HPLC analysis: Daicel Chiralce AS hexane/*i*-PrOH =95/5; flow rate =1.0 mL/min; 230nm;

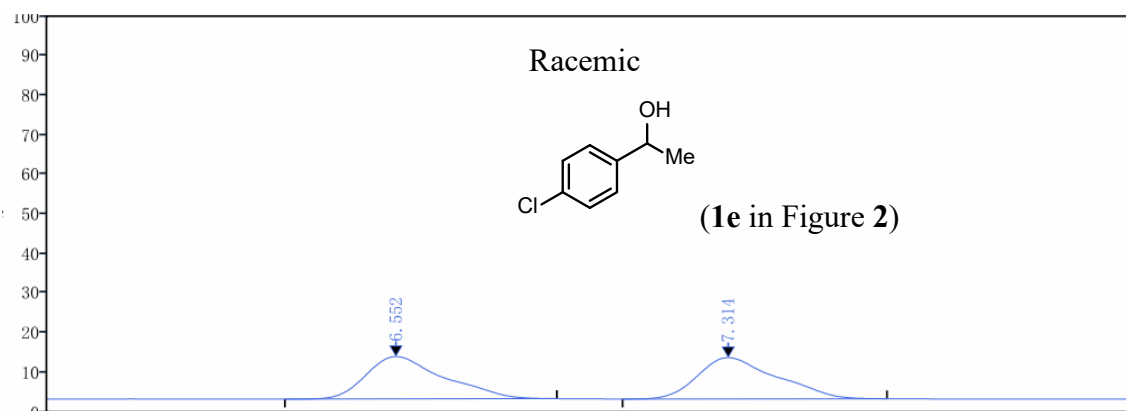

| Serial Number | Type | Retention Time [min] | Peak Area | Area % |
|---------------|------|----------------------|-----------|--------|
| 1             | BM   | 6.552                | 2817.16   | 50.24  |
| 2             | BM   | 7.314                | 2789.74   | 49.76  |
| The Total     |      |                      | 5606.90   |        |

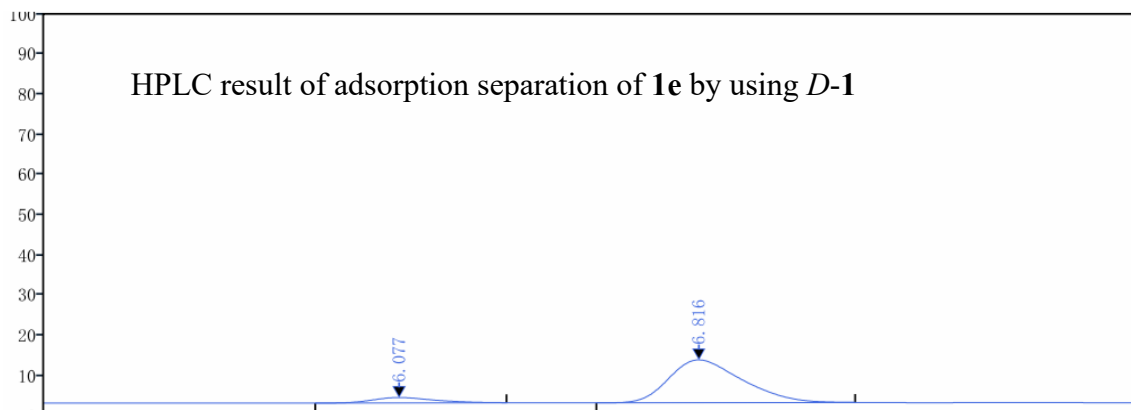

| Serial Number | Type | Retention Time [min] | Peak Area | Area % |
|---------------|------|----------------------|-----------|--------|
| 1             | BM   | 6.077                | 92.67     | 9.47   |
| 2             | MM   | 6.816                | 885.87    | 90.53  |
| The Total     |      |                      | 978.54    |        |

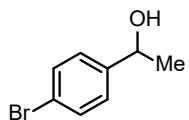

Chiral HPLC analysis: Daicel Chiralce OD: hexane/*i*-PrOH =95/5; flow rate =1.0 mL/min; 220 nm;

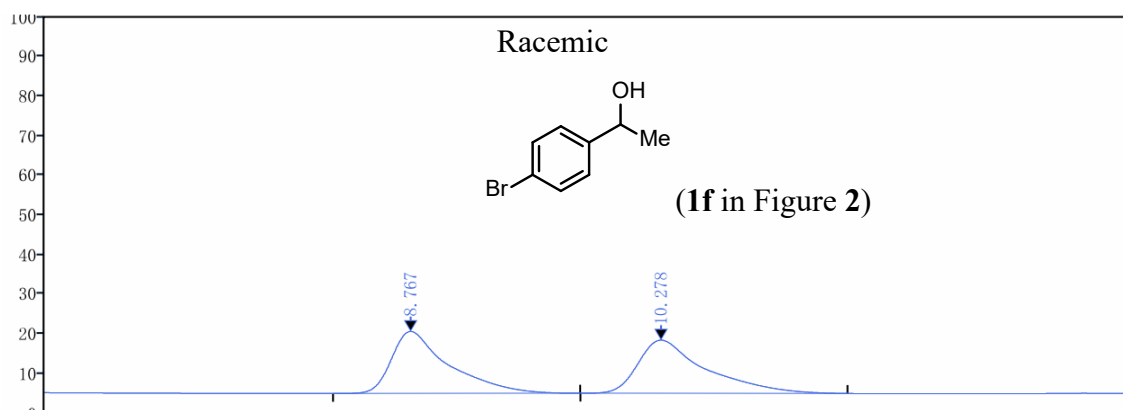

| Serial Number | Type | Retention Time [min] | Peak Area | Area % |
|---------------|------|----------------------|-----------|--------|
| 1             | BB   | 8.767                | 1723.27   | 49.60  |
| 2             | BM   | 10.278               | 1751.20   | 50.40  |
| The Total     |      |                      | 3474.47   |        |

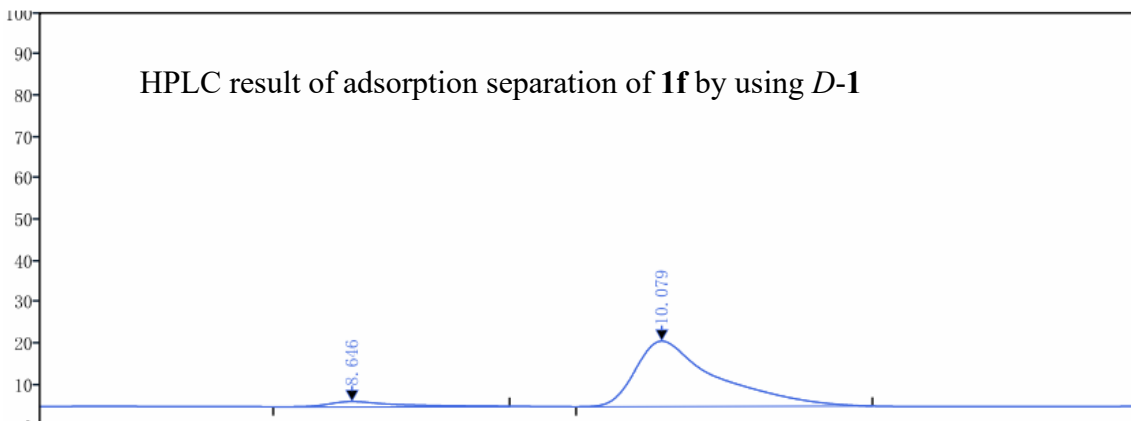

| Serial Number | Type | Retention Time [min] | Peak Area | Area % |
|---------------|------|----------------------|-----------|--------|
| 1             | MM   | 8.646                | 110.30    | 7.40   |
| 2             | BM   | 10.079               | 1380.77   | 92.60  |
| The Total     |      |                      | 1491.07   |        |

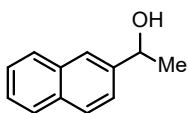

Chiral HPLC analysis: Daicel Chiralce OJ: hexane/*i*-PrOH =90/10; flow rate =1.0 mL/min; 220 nm;

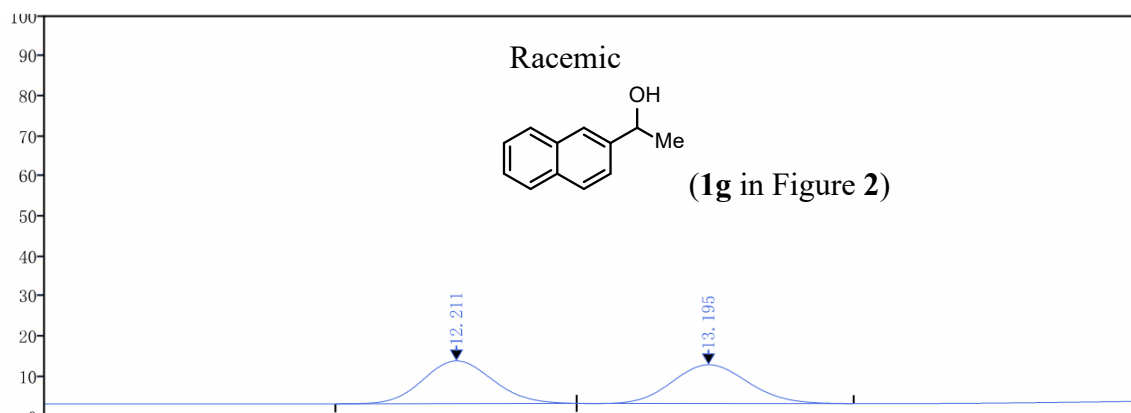

| Serial Number | Type | Retention Time [min] | Peak Area | Area % |
|---------------|------|----------------------|-----------|--------|
| 1             | MM   | 12.211               | 1074.15   | 50.48  |
| 2             | MM   | 13.195               | 1053.64   | 49.52  |
| The Total     |      |                      | 2127.79   |        |



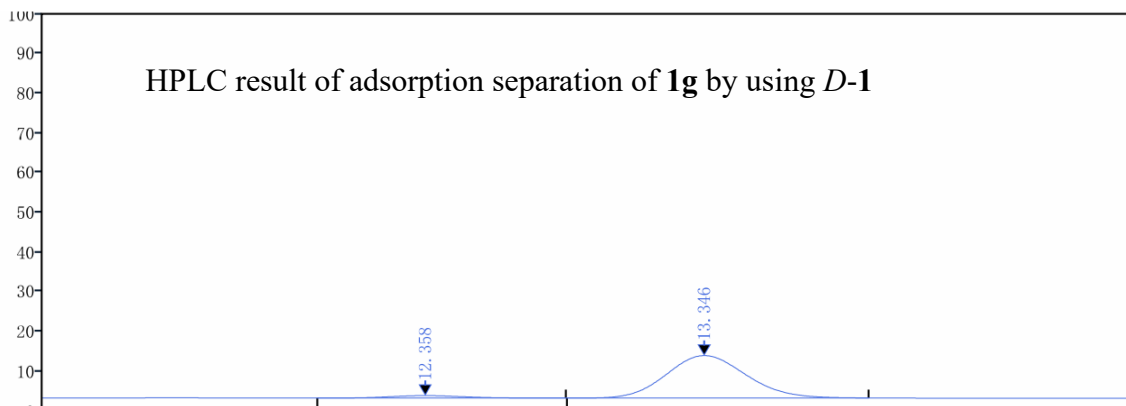

| Serial Number | Type | Retention Time [min] | Peak Area | Area % |
|---------------|------|----------------------|-----------|--------|
| 1             | BB   | 12.358               | 56.09     | 5.15   |
| 2             | BM   | 13.346               | 1034.07   | 94.85  |
| The Total     |      |                      | 1090.16   |        |

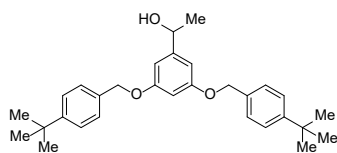

Chiral HPLC analysis: Daicel Chiralce IA: hexane/*i*-PrOH =95/5; flow rate =1.0 mL/min; 220 nm.

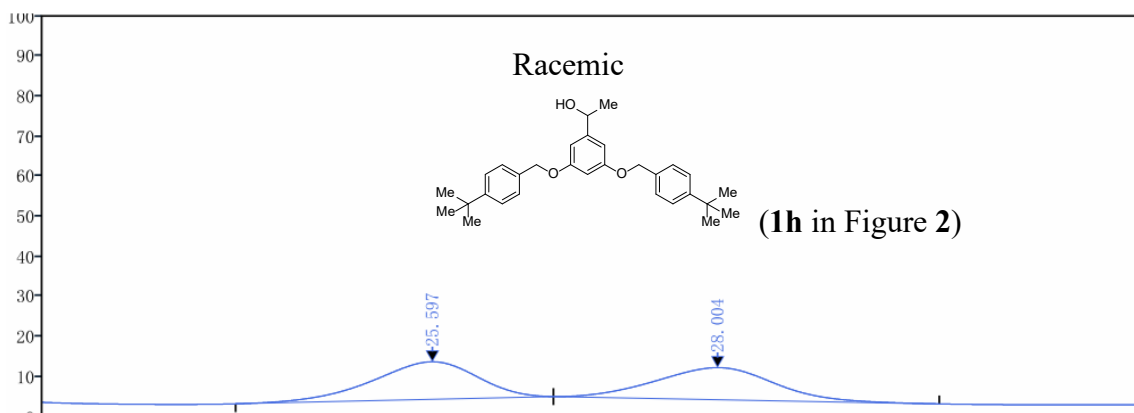

| Serial Number | Type | Retention Time [min] | Peak Area | Area % |
|---------------|------|----------------------|-----------|--------|
| 1             | MM   | 25.597               | 2992.83   | 50.90  |
| 2             | MM   | 28.004               | 2886.63   | 49.10  |
| The Total     |      |                      | 5879.46   |        |

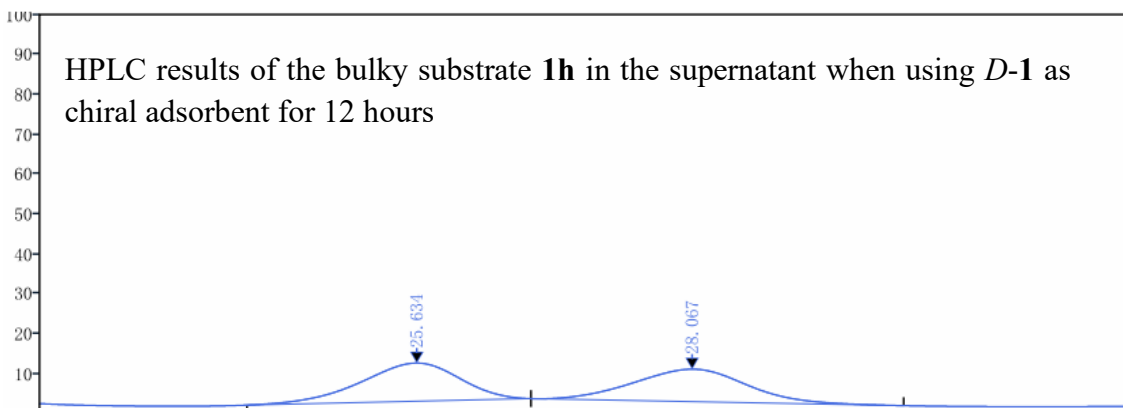

| Serial Number | Type | Retention Time [min] | Peak Area | Area % |
|---------------|------|----------------------|-----------|--------|
| 1             | MM   | 25.634               | 2879.63   | 50.55  |
| 2             | MM   | 28.067               | 2816.98   | 49.45  |
| The Total     |      |                      | 5696.61   |        |

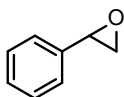

Chiral HPLC analysis: Daicel Chiralce IC: hexane/*i*-PrOH =95/5; flow rate =1.0 mL/min;  
220 nm;

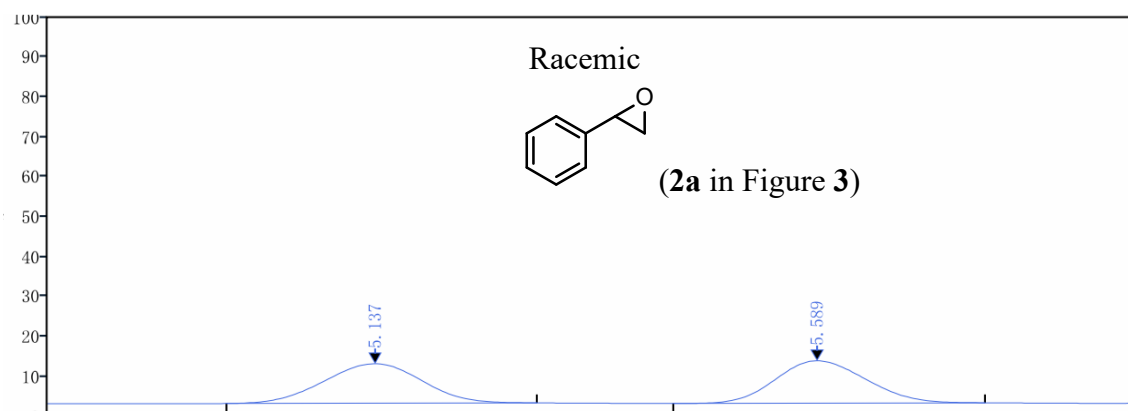

| Serial Number | Type | Retention Time [min] | Peak Area | Area % |
|---------------|------|----------------------|-----------|--------|
| 1             | MM   | 5.137                | 2394.39   | 50.29  |
| 2             | BM   | 5.589                | 2366.98   | 49.71  |
| The Total     |      |                      | 4761.37   |        |

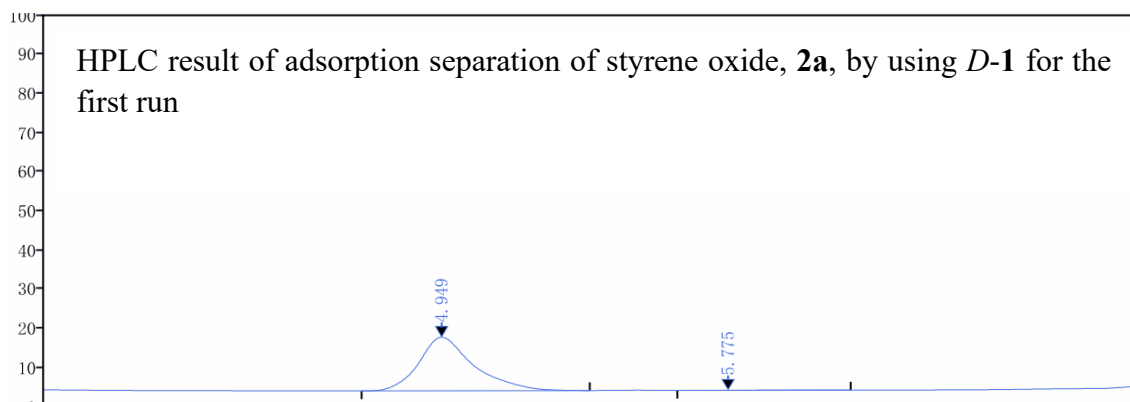

| Serial Number | Type | Retention Time [min] | Peak Area | Area % |
|---------------|------|----------------------|-----------|--------|
| 1             | BB   | 4.949                | 1053.24   | 99.92  |
| 2             | MM   | 5.775                | 0.87      | 0.08   |
| The Total     |      |                      | 1054.11   |        |

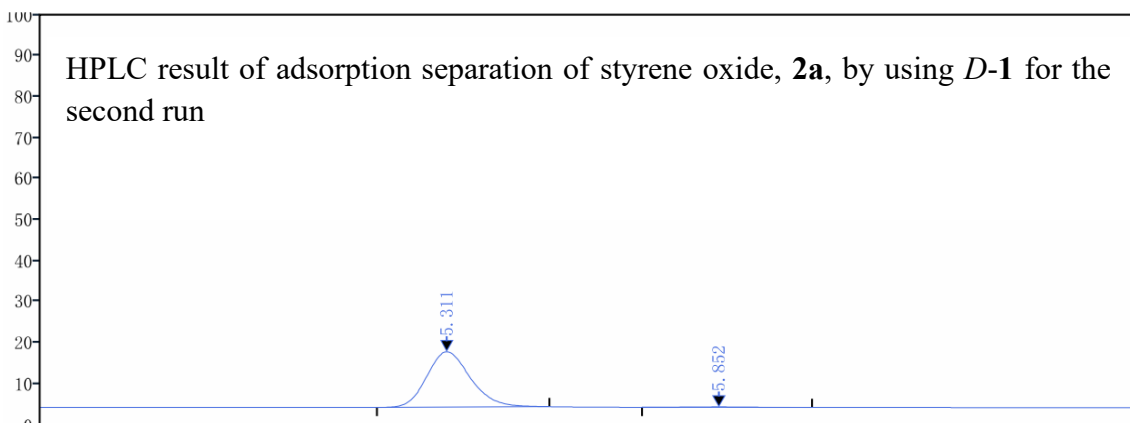

| Serial Number | Type | Retention Time [min] | Peak Area | Area % |
|---------------|------|----------------------|-----------|--------|
| 1             | MM   | 5.311                | 625.97    | 99.69  |
| 2             | MM   | 5.852                | 1.96      | 0.31   |
| The Total     |      |                      | 627.93    |        |

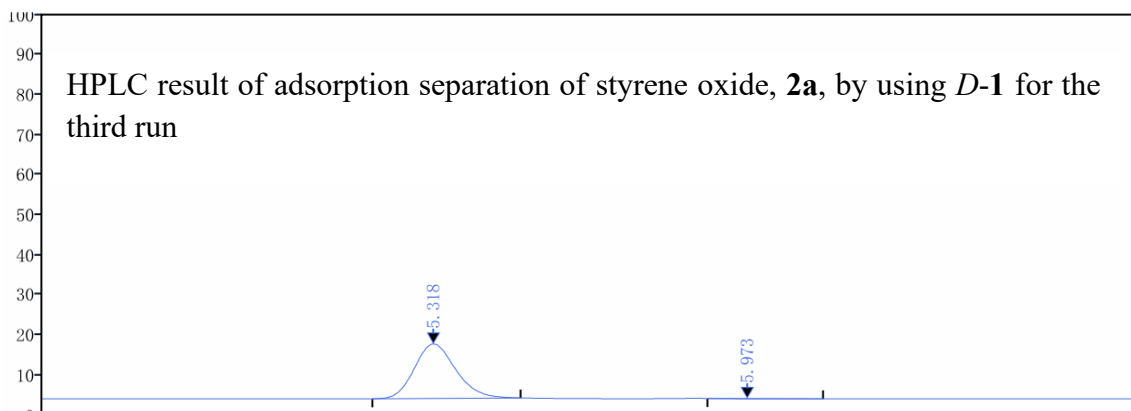

| Serial Number | Type | Retention Time [min] | Peak Area | Area % |
|---------------|------|----------------------|-----------|--------|
| 1             | MM   | 5.318                | 619.54    | 99.54  |
| 2             | MM   | 5.973                | 2.88      | 0.46   |
| The Total     |      |                      | 622.42    |        |

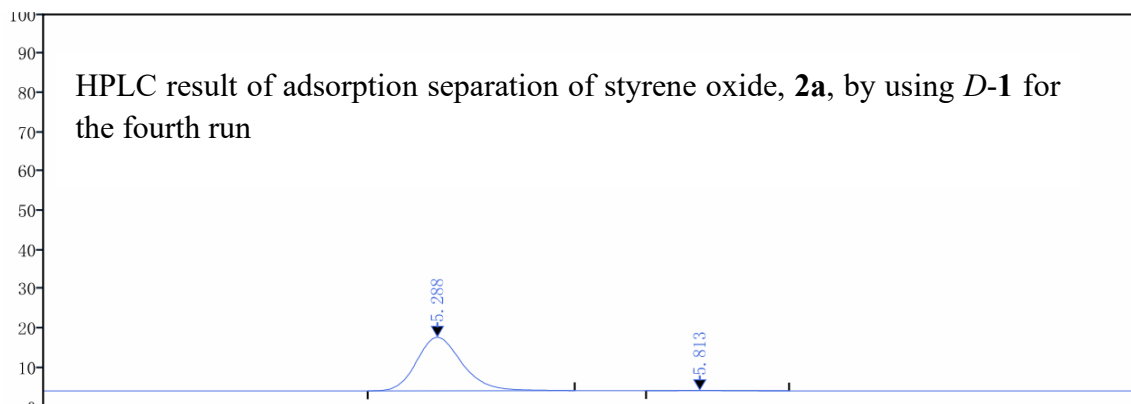

| Serial Number | Type | Retention Time [min] | Peak Area | Area % |
|---------------|------|----------------------|-----------|--------|
| 1             | MM   | 5.288                | 962.89    | 99.86  |
| 2             | MM   | 5.813                | 1.33      | 0.14   |
| The Total     |      |                      | 964.22    |        |

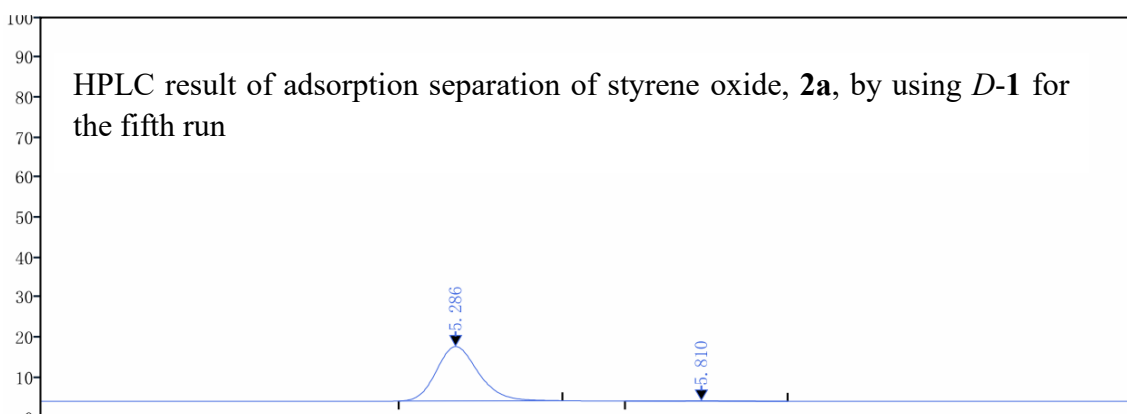

| Serial Number | Type | Retention Time [min] | Peak Area | Area % |
|---------------|------|----------------------|-----------|--------|
| 1             | MM   | 5.286                | 834.92    | 99.52  |
| 2             | MM   | 5.810                | 4.05      | 0.48   |
| The Total     |      |                      | 838.97    |        |

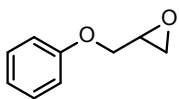

Chiral HPLC analysis: Daicel Chiralcel AS: hexane/*i*-PrOH =98/2; flow rate =1.0 mL/min; 220 nm;

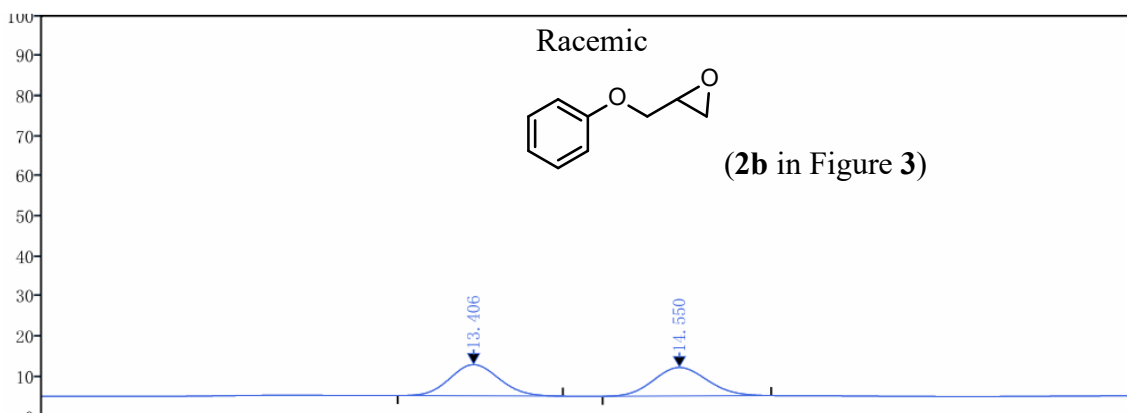

| Serial Number | Type | Retention Time [min] | Peak Area | Area % |
|---------------|------|----------------------|-----------|--------|
| 1             | MM   | 13.406               | 811.88    | 50.15  |
| 2             | MM   | 14.550               | 807.14    | 49.85  |
| The Total     |      |                      | 1619.02   |        |

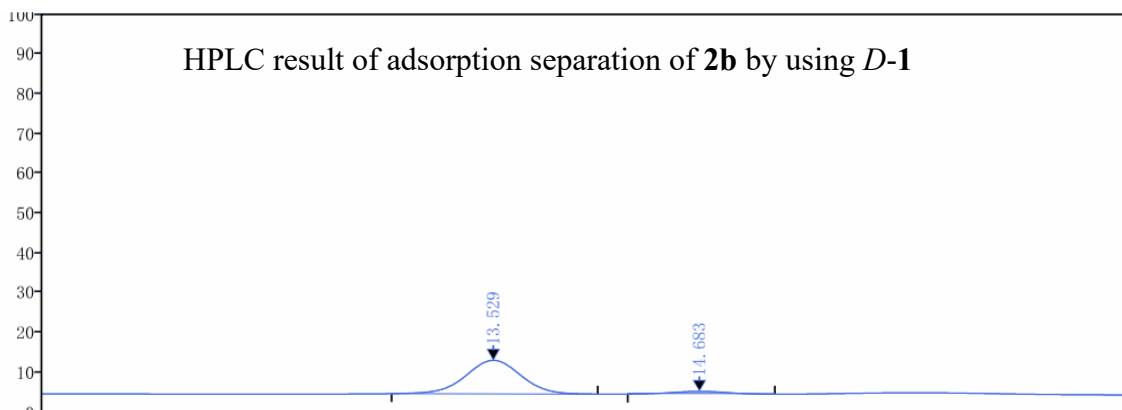

| Serial Number | Type | Retention Time [min] | Peak Area | Area % |
|---------------|------|----------------------|-----------|--------|
| 1             | MM   | 13.529               | 508.95    | 96.25  |
| 2             | MM   | 14.683               | 19.81     | 3.75   |
| The Total     |      |                      | 528.76    |        |

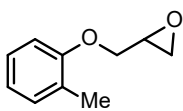

Chiral HPLC analysis: Daicel Chiralce IA: hexane/*i*-PrOH =98/2; flow rate =1.0 mL/min; 220 nm;

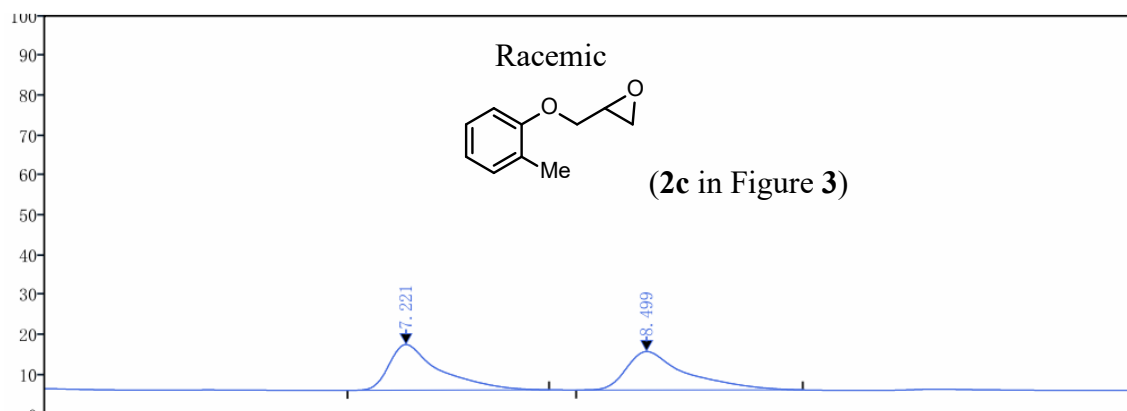

| Serial Number | Type | Retention Time [min] | Peak Area | Area % |
|---------------|------|----------------------|-----------|--------|
| 1             | BM   | 7.221                | 771.51    | 50.10  |
| 2             | BM   | 8.499                | 768.53    | 49.90  |
| The Total     |      |                      | 1540.04   |        |

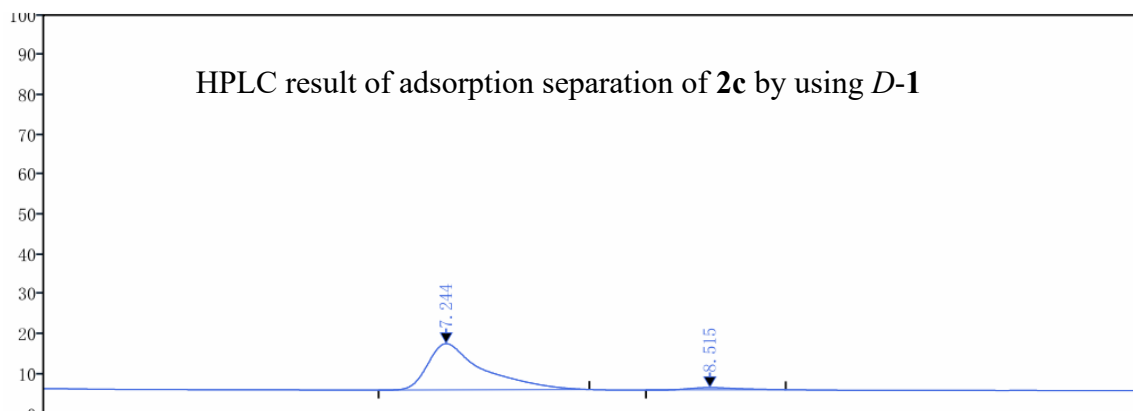

| Serial Number | Type | Retention Time [min] | Peak Area | Area % |
|---------------|------|----------------------|-----------|--------|
| 1             | BM   | 7.244                | 334.21    | 96.42  |
| 2             | MM   | 8.515                | 12.39     | 3.58   |
| The Total     |      |                      | 346.60    |        |

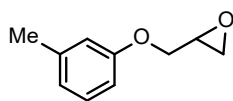

Chiral HPLC analysis: Daicel Chiralce AS: hexane/*i*-PrOH =98/2; flow rate =1.0 mL/min; 220 nm;

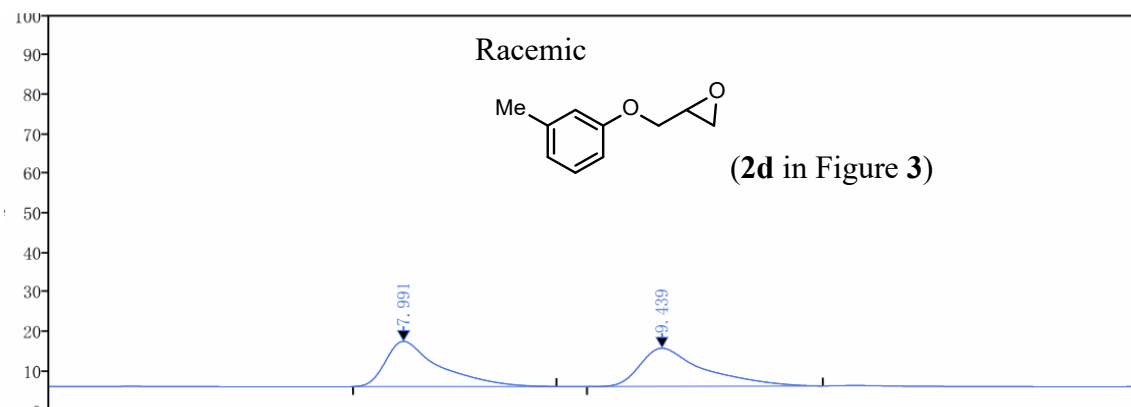

| Serial Number | Type | Retention Time [min] | Peak Area | Area % |
|---------------|------|----------------------|-----------|--------|
| 1             | MM   | 7.991                | 816.77    | 50.07  |
| 2             | BB   | 9.439                | 814.60    | 49.93  |
| The Total     |      |                      | 1631.37   |        |

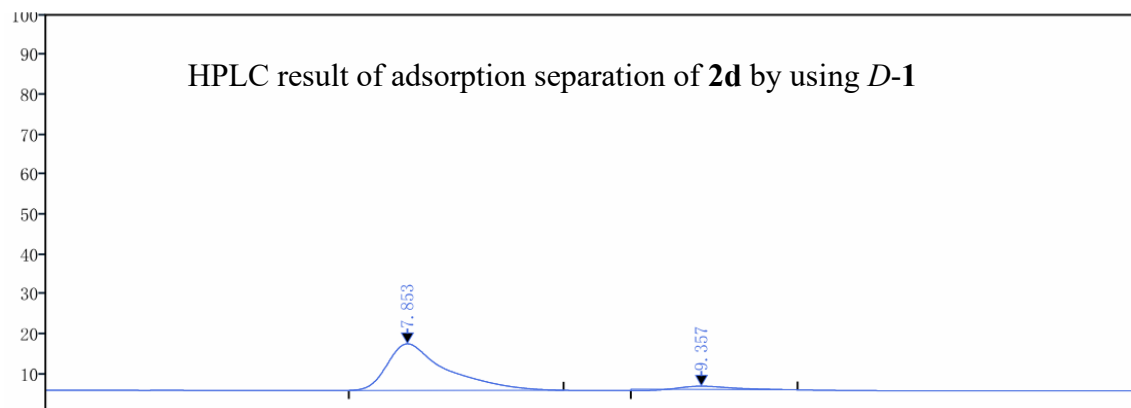

| Serial Number | Type | Retention Time [min] | Peak Area | Area % |
|---------------|------|----------------------|-----------|--------|
| 1             | MM   | 7.853                | 1006.97   | 96.15  |
| 2             | MM   | 9.357                | 40.33     | 3.85   |
| The Total     |      |                      | 1047.30   |        |

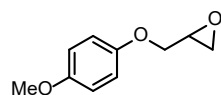

Chiral HPLC analysis: Daicel Chiralce OD: hexane/*i*-PrOH =90/10; flow rate =1.0 mL/min; 254 nm;

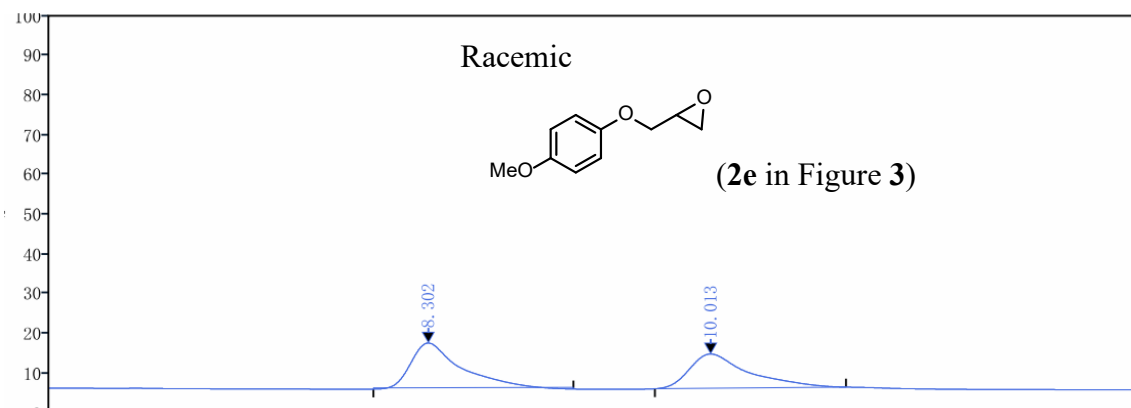

| Serial Number | Type | Retention Time [min] | Peak Area | Area % |
|---------------|------|----------------------|-----------|--------|
| 1             | MM   | 8.302                | 139.79    | 51.56  |
| 2             | MM   | 10.013               | 131.36    | 48.44  |
| The Total     |      |                      | 271.15    |        |



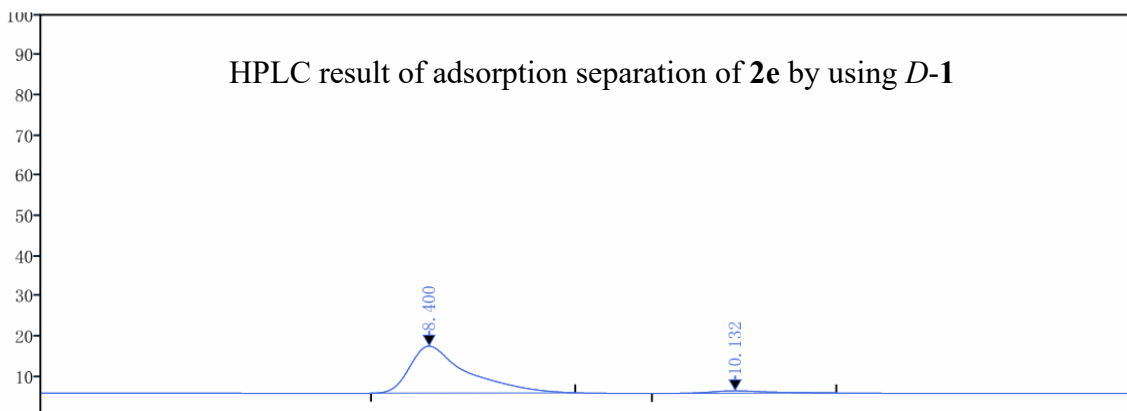

| Serial Number | Type | Retention Time [min] | Peak Area | Area % |
|---------------|------|----------------------|-----------|--------|
| 1             | MM   | 8.400                | 1442.12   | 95.17  |
| 2             | BM   | 10.132               | 73.21     | 4.83   |
| The Total     |      |                      | 1515.33   |        |

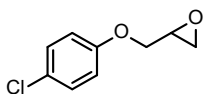

Chiral HPLC analysis: Daicel Chiralce OJ: hexane/*i*-PrOH =95/5; flow rate =1.0 mL/min; 220 nm;

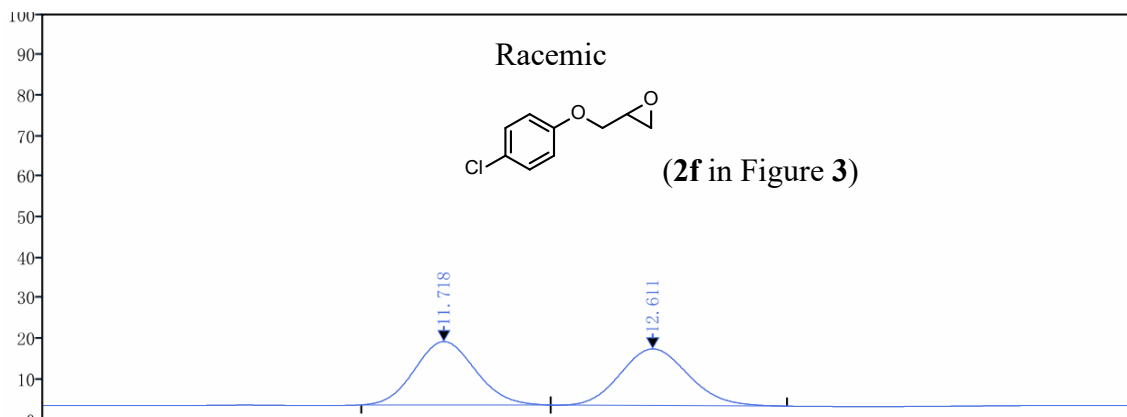

| Serial Number | Type | Retention Time [min] | Peak Area | Area % |
|---------------|------|----------------------|-----------|--------|
| 1             | MM   | 11.718               | 818.13    | 50.08  |
| 2             | MM   | 12.611               | 815.59    | 49.92  |
| The Total     |      |                      | 1633.72   |        |

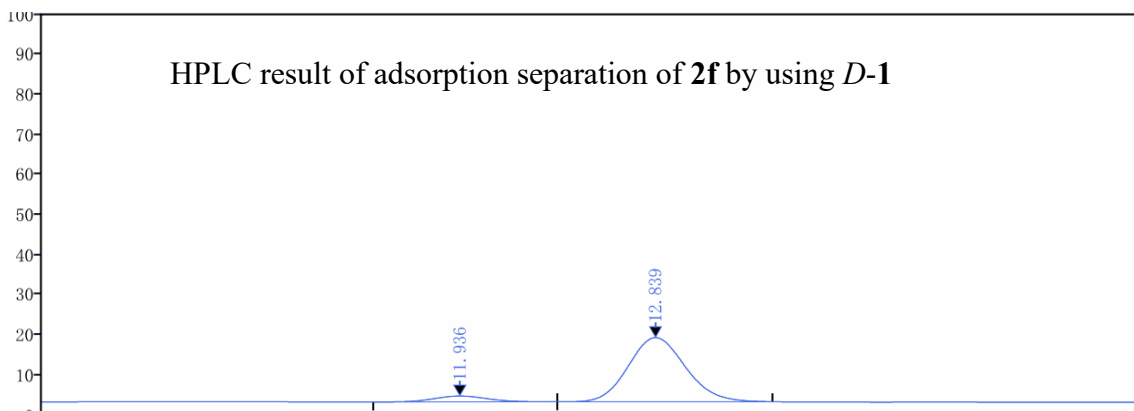

| Serial Number | Type | Retention Time [min] | Peak Area | Area % |
|---------------|------|----------------------|-----------|--------|
| 1             | BB   | 11.936               | 73.00     | 7.84   |
| 2             | BM   | 12.839               | 858.05    | 92.16  |
| The Total     |      |                      | 931.05    |        |

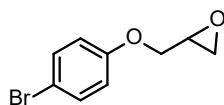

Chiral HPLC analysis: Daicel Chiralce OJ: hexane/*i*-PrOH =90/10; flow rate =1.0 mL/min; 220 nm;

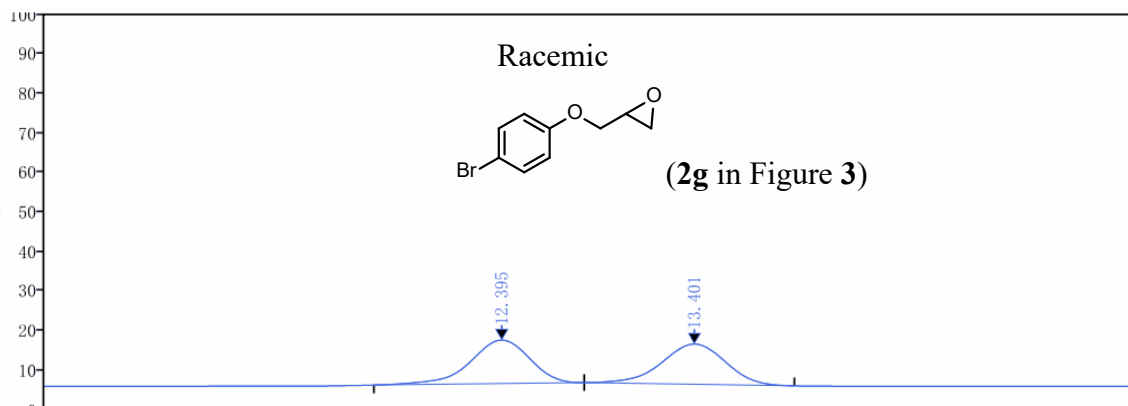

| Serial Number | Type | Retention Time [min] | Peak Area | Area % |
|---------------|------|----------------------|-----------|--------|
| 1             | MM   | 12.395               | 1896.34   | 50.16  |
| 2             | MM   | 13.401               | 1883.87   | 49.84  |
| The Total     |      |                      | 3780.21   |        |

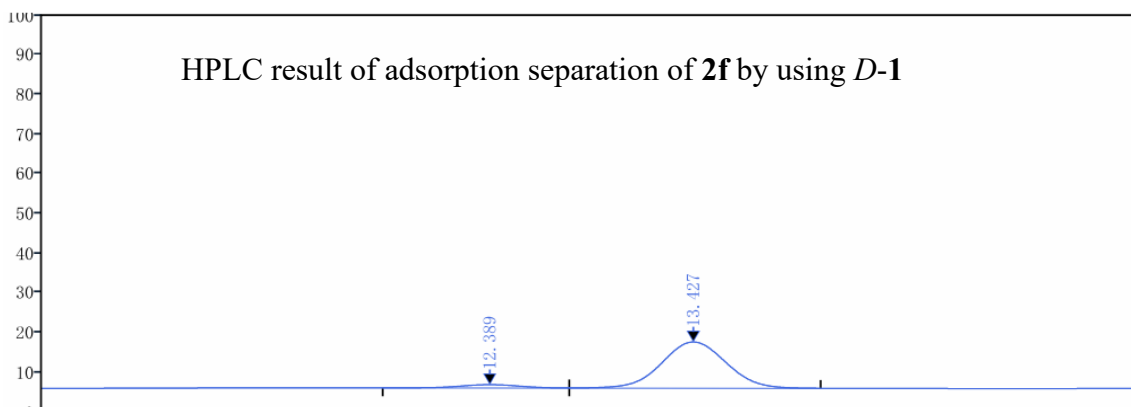

| Serial Number | Type | Retention Time [min] | Peak Area | Area % |
|---------------|------|----------------------|-----------|--------|
| 1             | BM   | 12.389               | 118.11    | 6.11   |
| 2             | MM   | 13.427               | 1814.32   | 93.89  |
| The Total     |      |                      | 1932.43   |        |

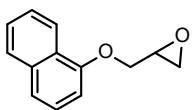

Chiral HPLC analysis: Daicel Chiralce AS: hexane/*i*-PrOH =98/2; flow rate =1.0 mL/min; 220 nm;

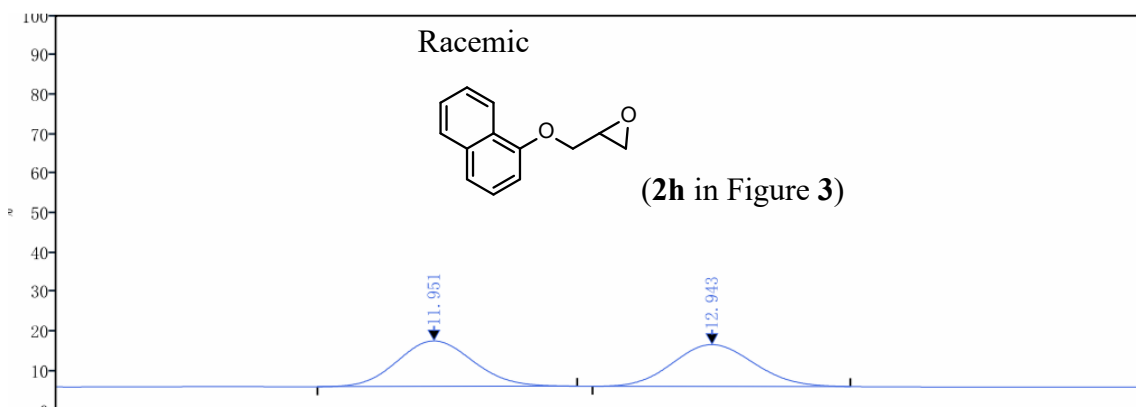

| Serial Number | Type | Retention Time [min] | Peak Area | Area % |
|---------------|------|----------------------|-----------|--------|
| 1             | MM   | 11.951               | 1288.13   | 50.09  |
| 2             | MM   | 12.943               | 1283.38   | 49.91  |
| The Total     |      |                      | 2571.51   |        |

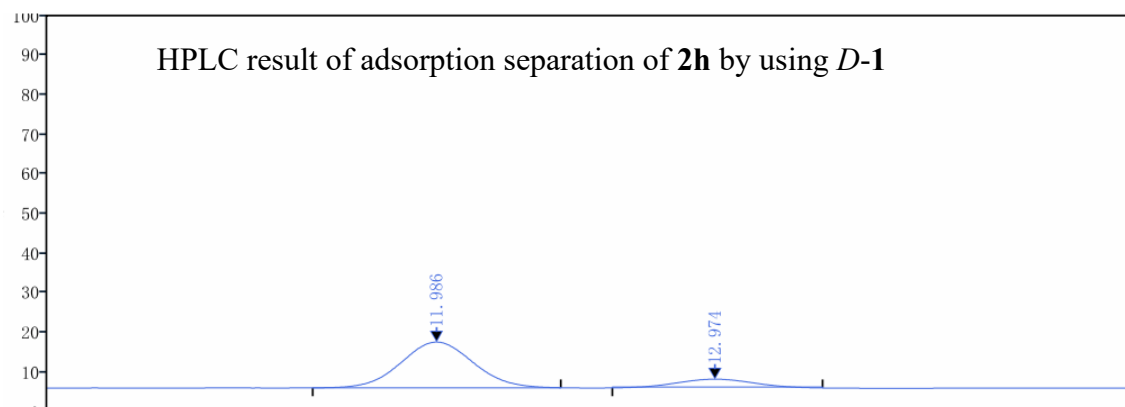

| Serial Number | Type | Retention Time [min] | Peak Area | Area % |
|---------------|------|----------------------|-----------|--------|
| 1             | MM   | 11.986               | 272.50    | 86.54  |
| 2             | MM   | 12.974               | 42.40     | 13.46  |
| The Total     |      |                      | 314.90    |        |

**14. Figure S9. Structural drawing of asymmetric unit of *D-1*.**

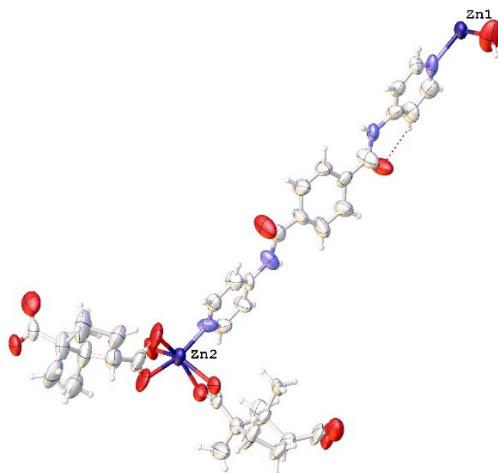

Supplement: d2dt01221a1.pdf [file d2dt01221a1.pdf]
